# Supplementary material for: Rapid DNA methylation-based classification of pediatric brain tumors from ultrasonic aspirate specimens
Source: PubMed Central journal article supplement (PMC11269392; doi:10.1007/s11060-024-04702-6), 2024-05-21

**Supplemental Figure 1:** Comparison of copy number variation profiles obtained from **(A)** ultrasonic aspirator tissue samples and nanopore sequencing and **(B)** FFPE tumor tissue subjected to EPIC microarray (850K).

**(A)**

Ultrasonic aspirator | DX-BLN-025

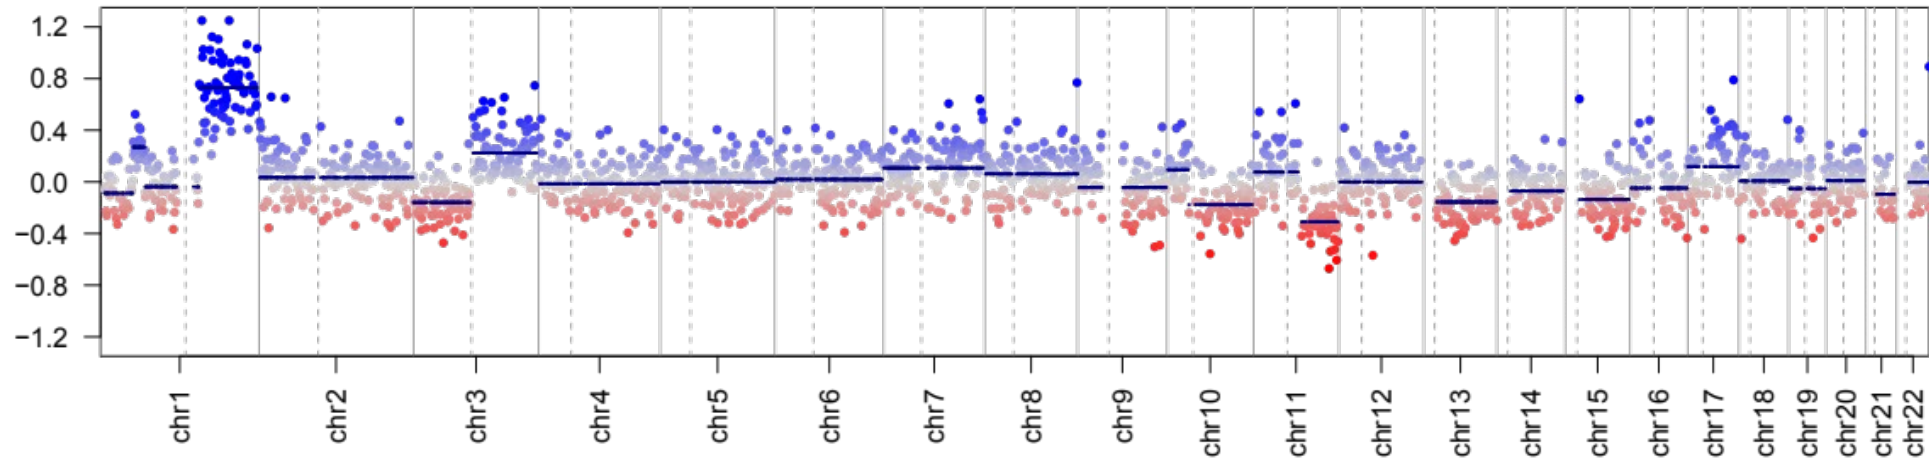

**(B)**

Microarray | DX-BLN-025

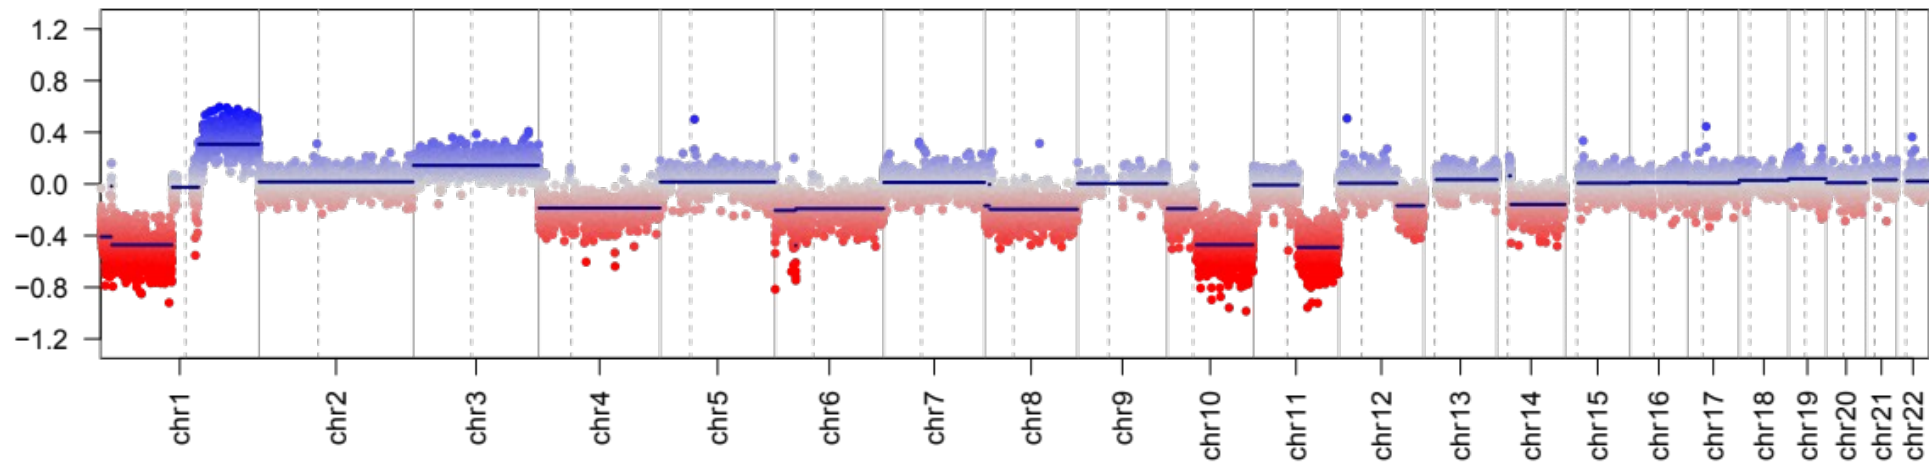

(A)

Ultrasonic aspirator I DX-BLN-027

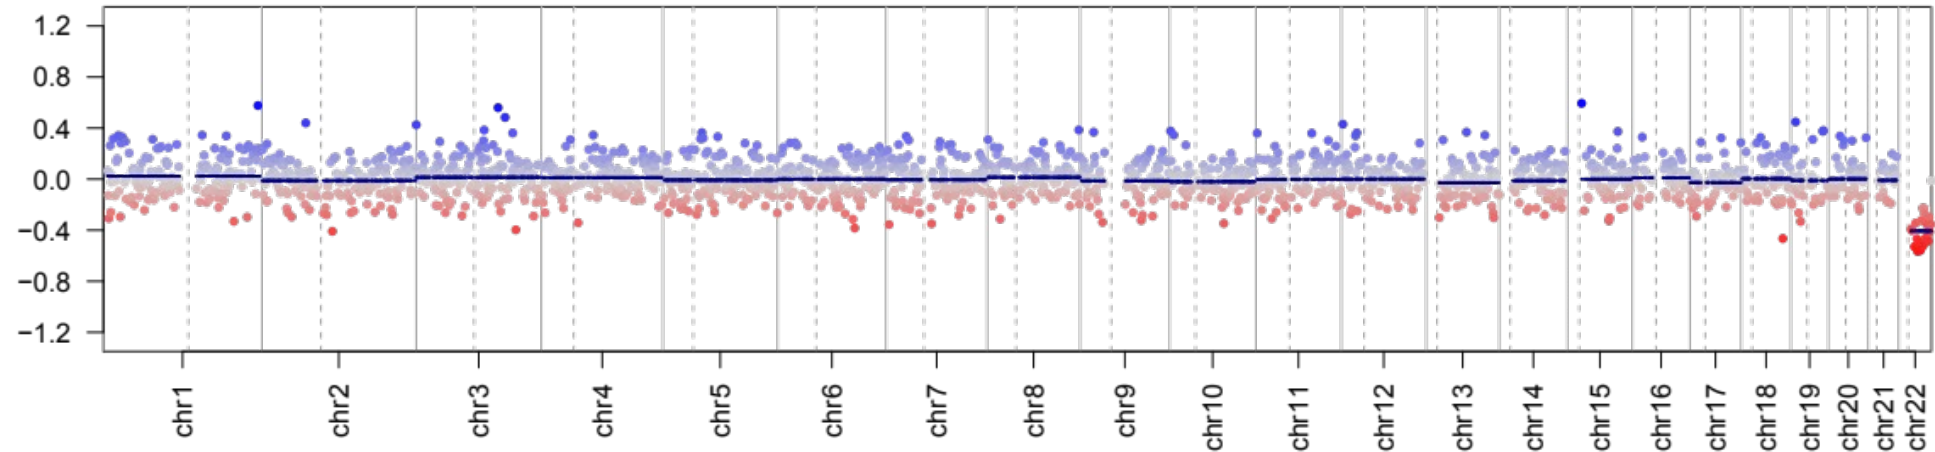

(B)

Microarray I DX-BLN-027

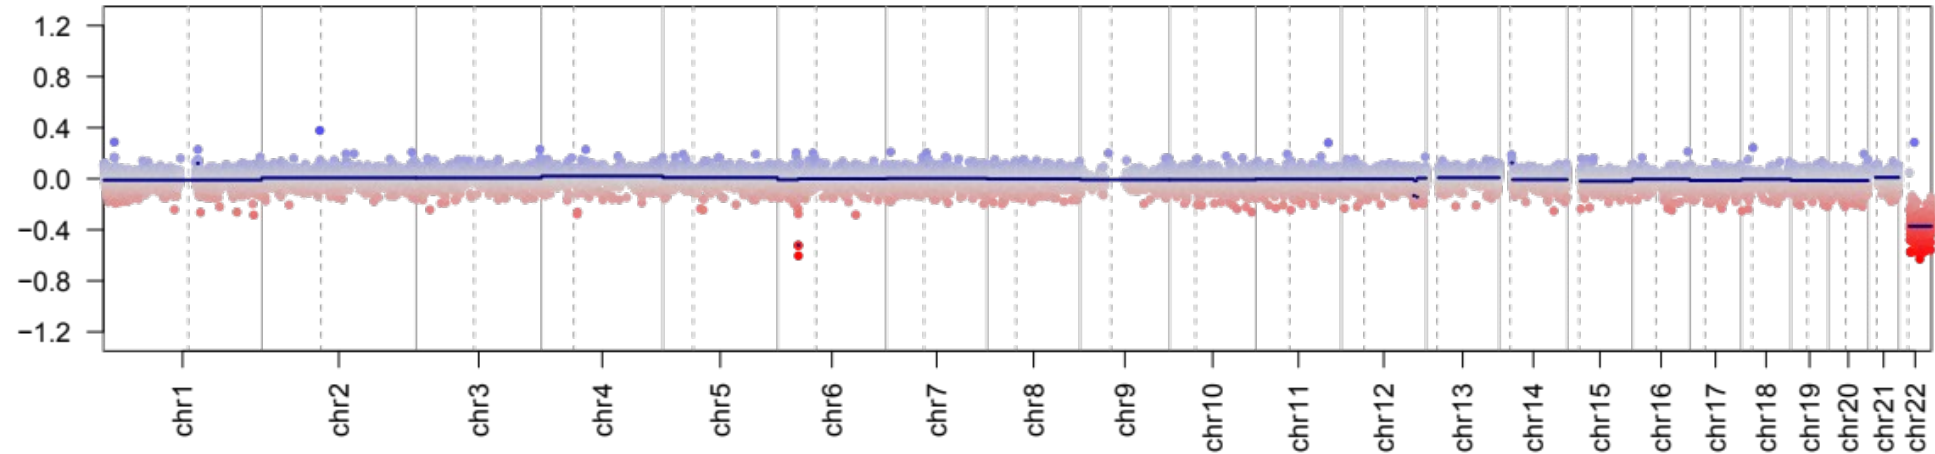

(A)

Ultrasonic aspirator I DX-BLN-028

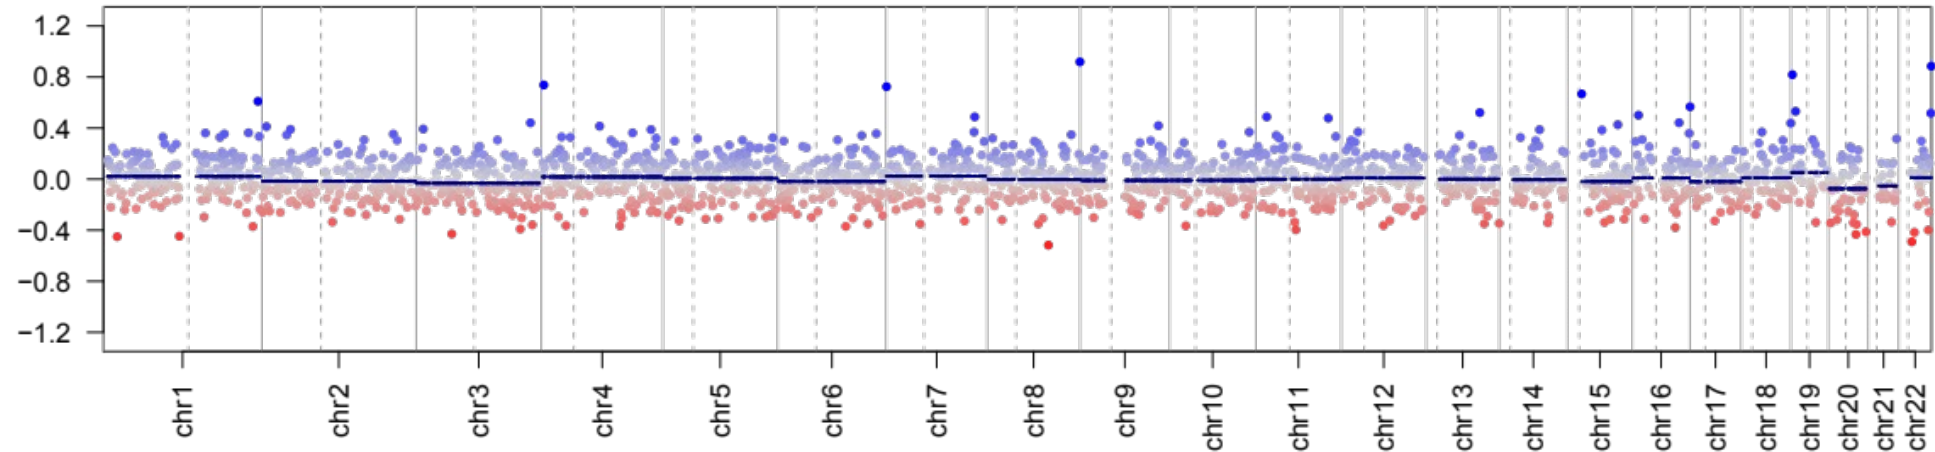

(B)

Microarray I DX-BLN-028

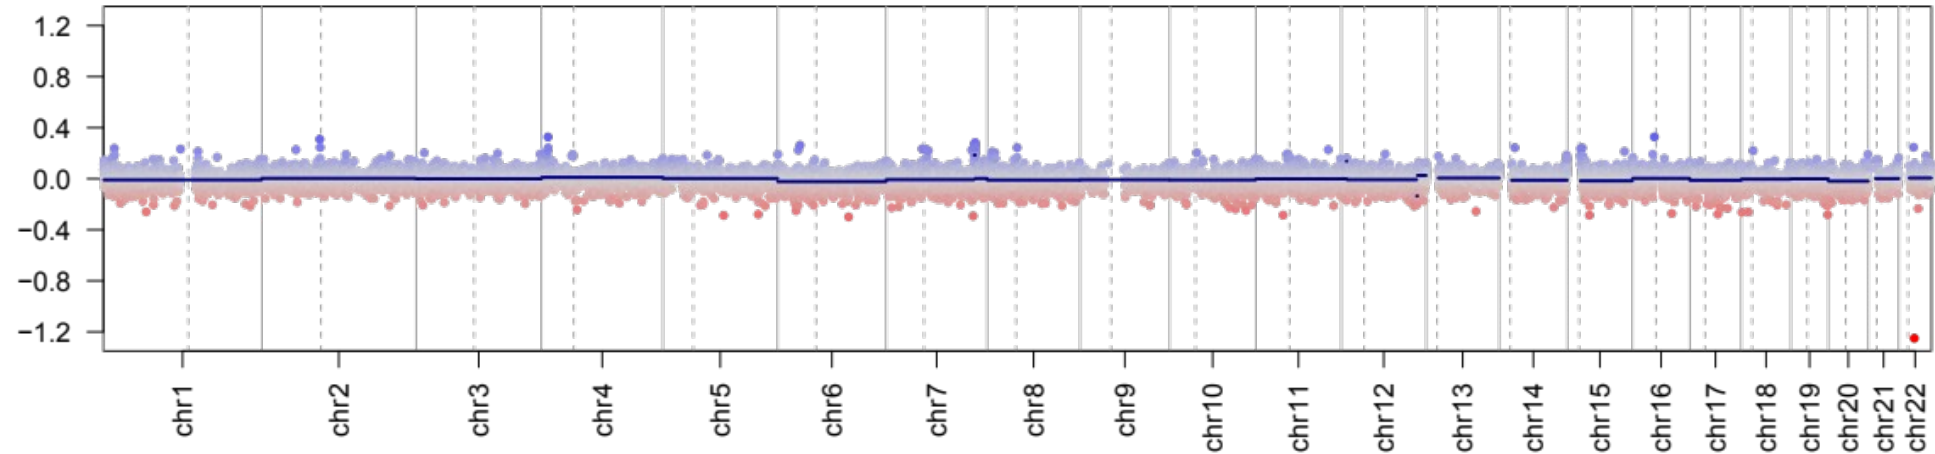

(A)

Ultrasonic aspirator I DX-BLN-029

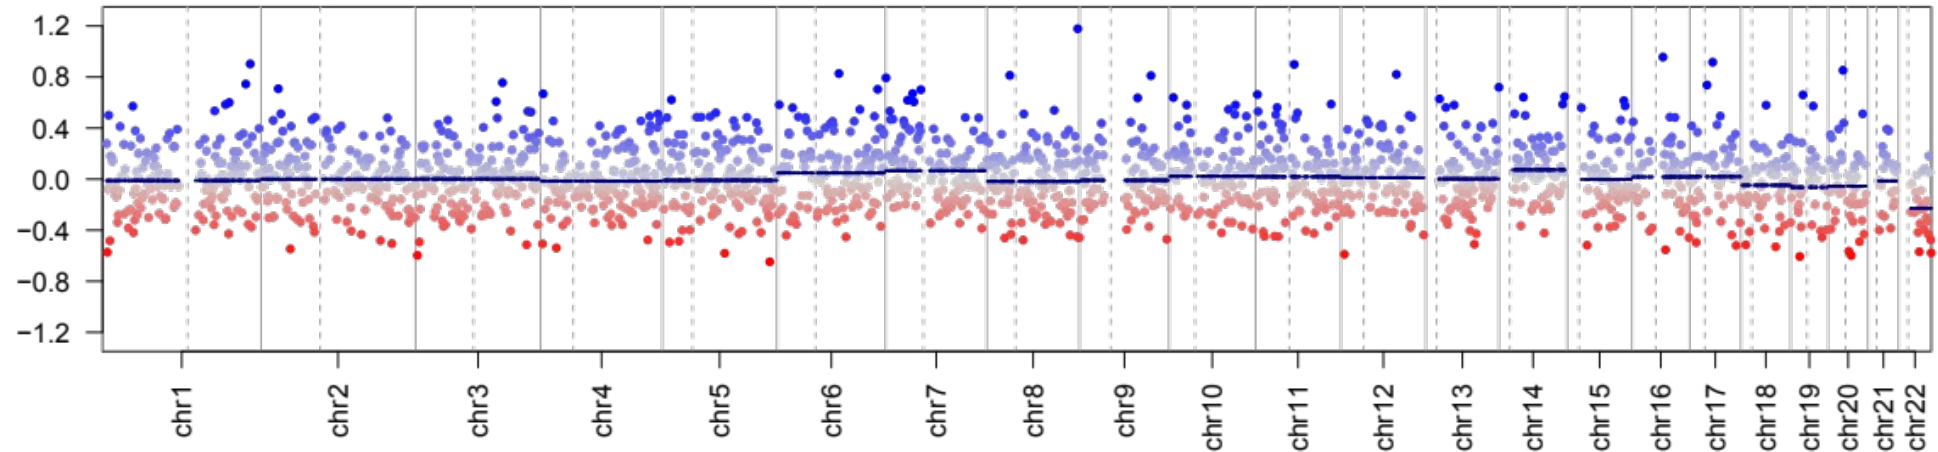

(B)

Microarray I DX-BLN-029

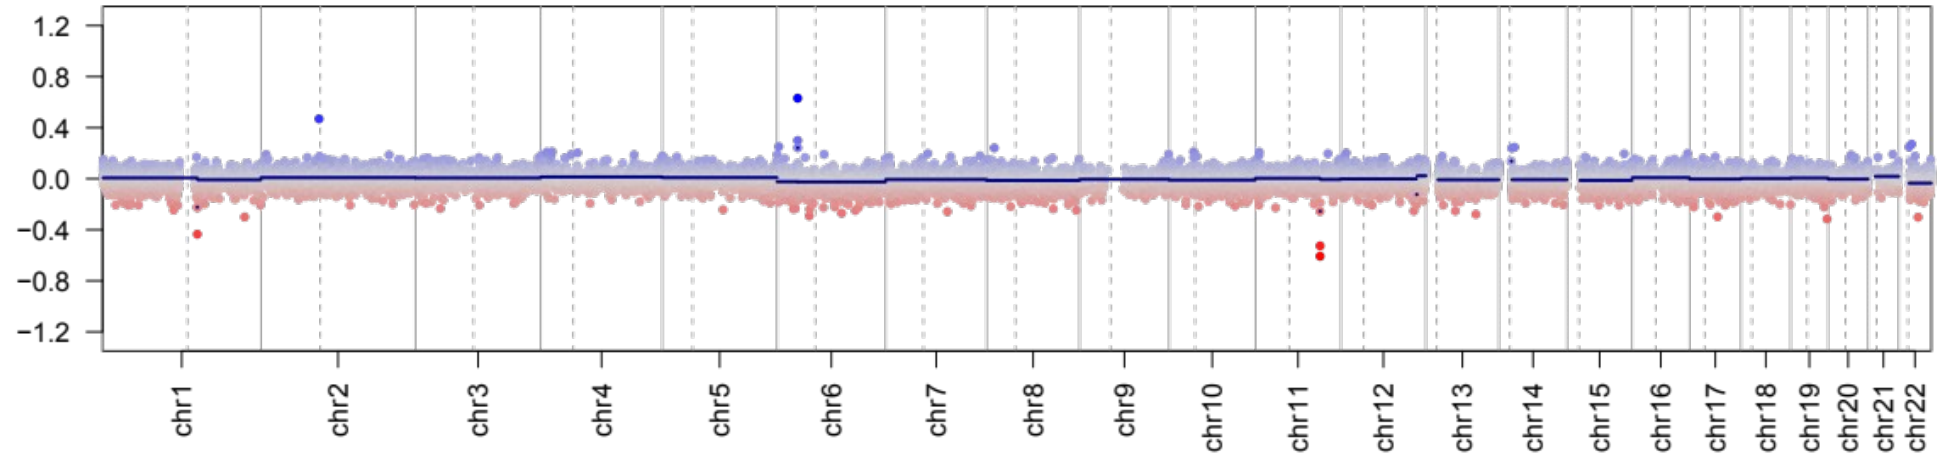

(A)

Ultrasonic aspirator I DX-BLN-037

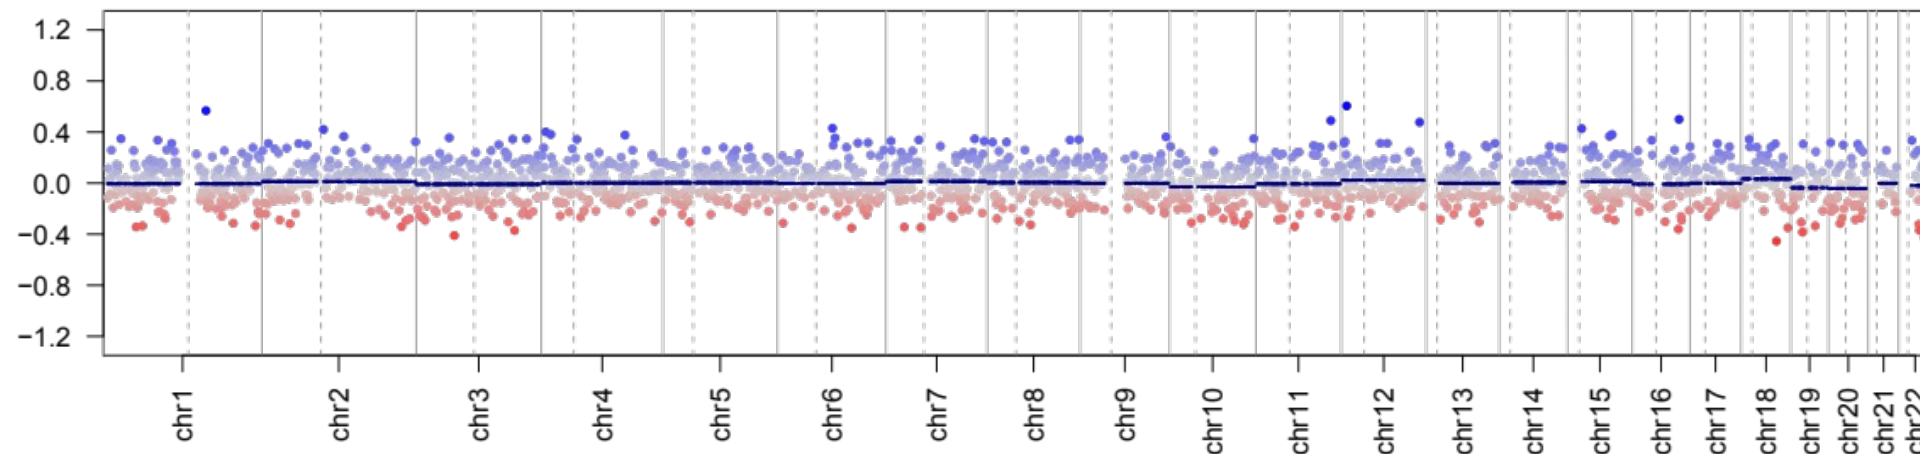

(B)

Microarray I DX-BLN-037

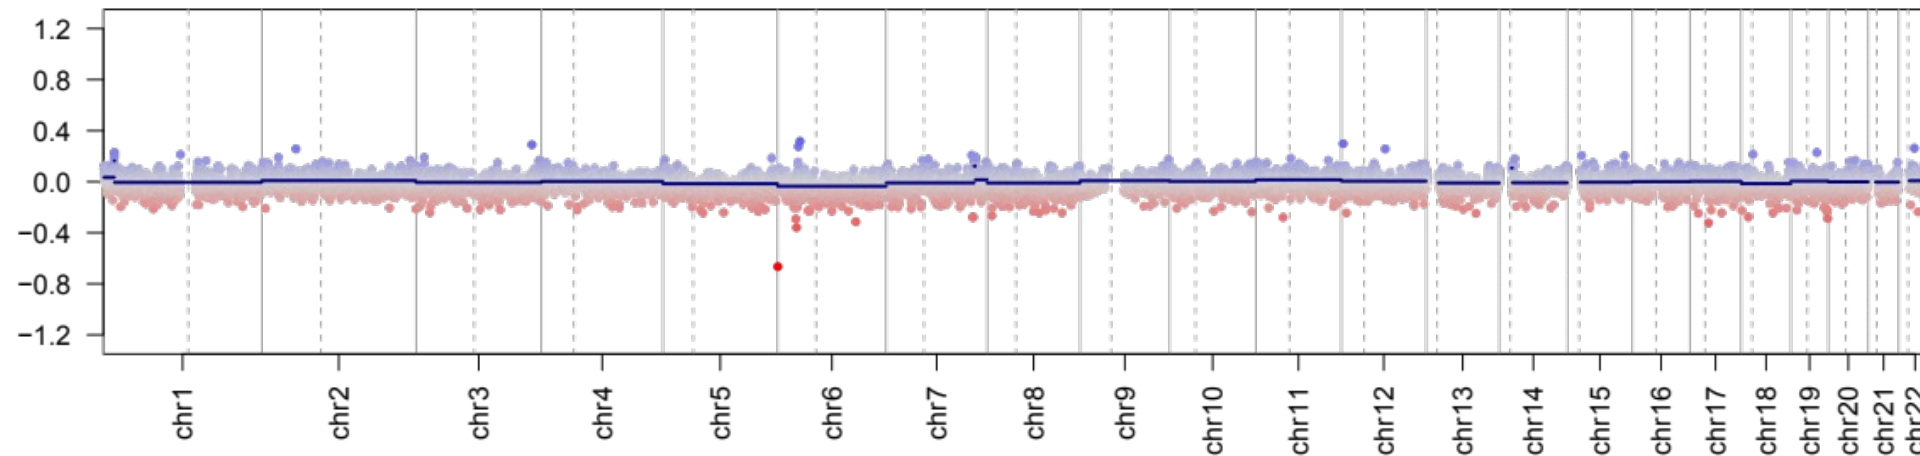



(A)

Ultrasonic aspirator I DX-BLN-042

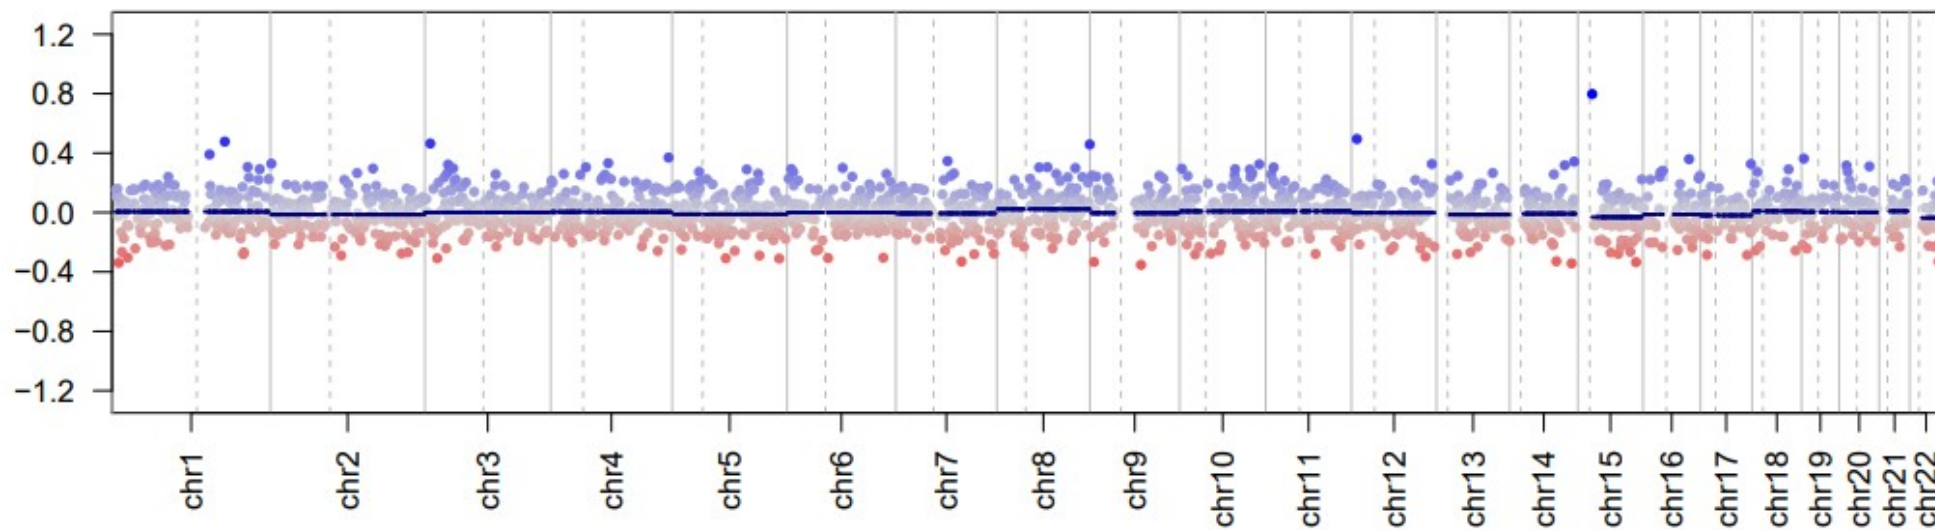

(B)

Microarray I DX-BLN-042

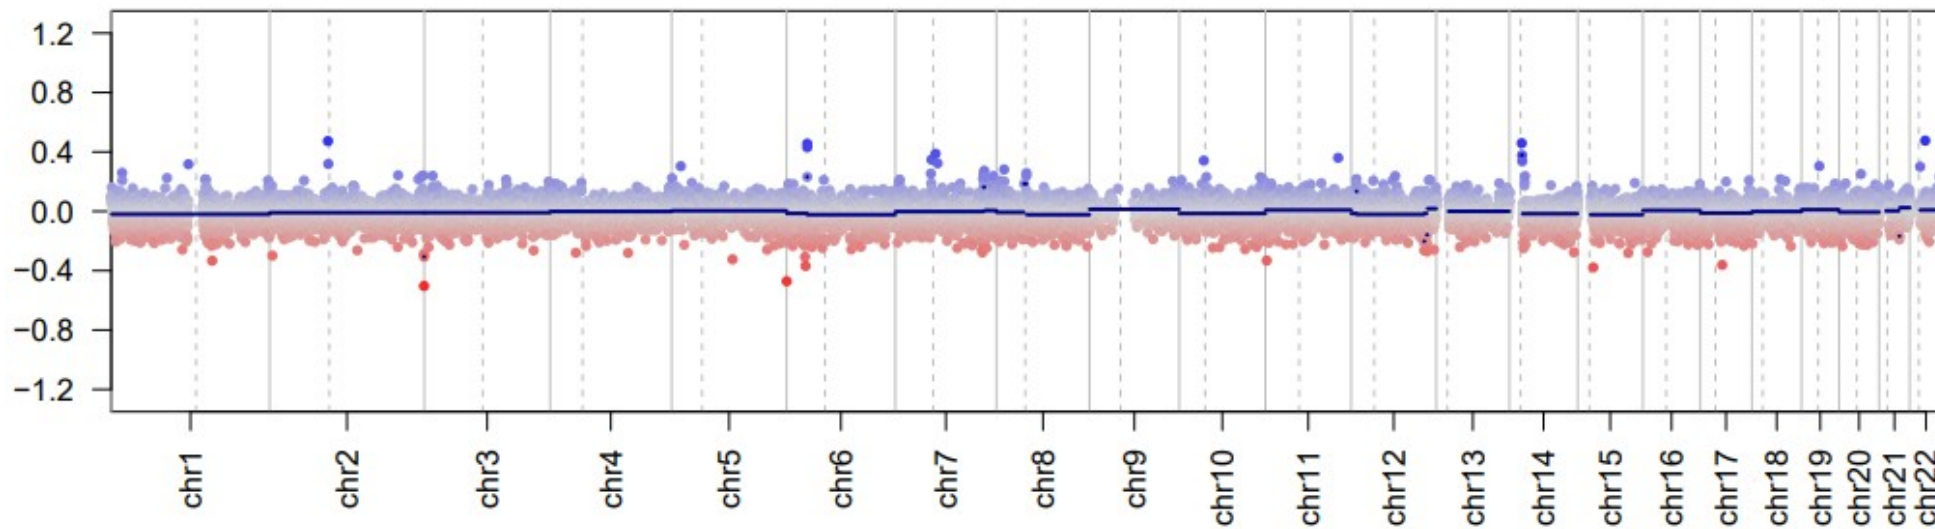

(A)

Ultrasonic aspirator I DX-BLN-043

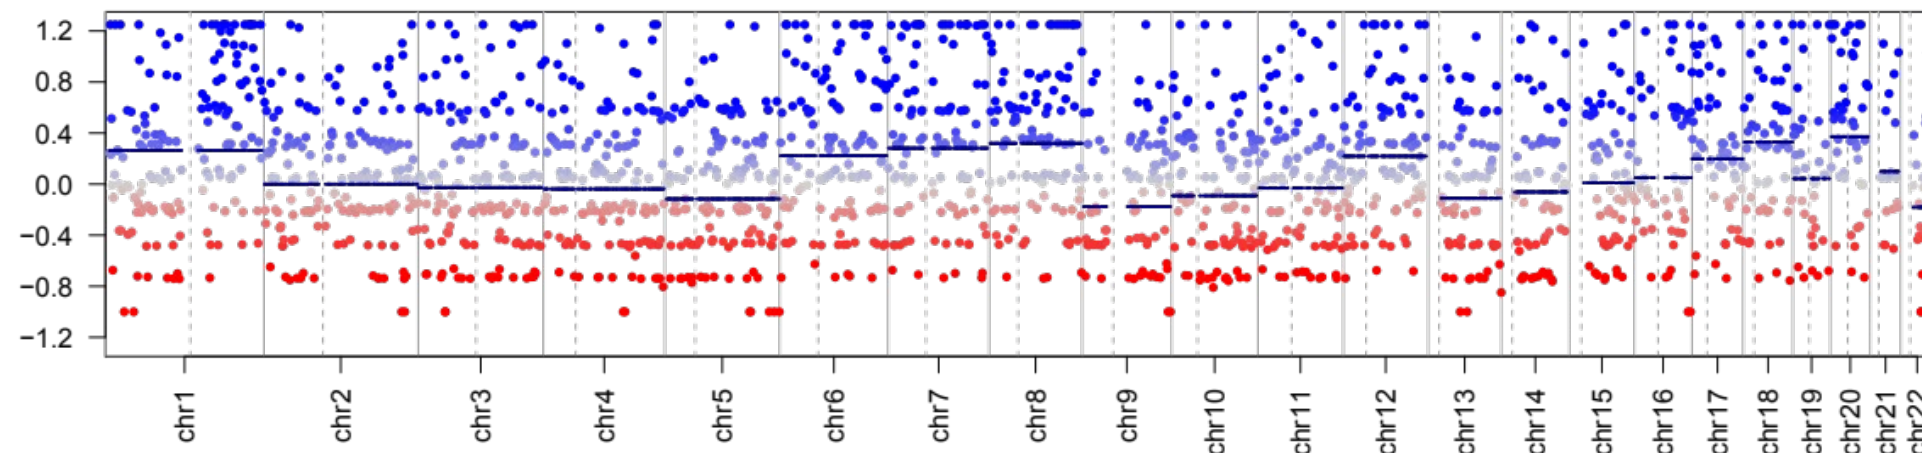

(B)

Microarray I DX-BLN-043

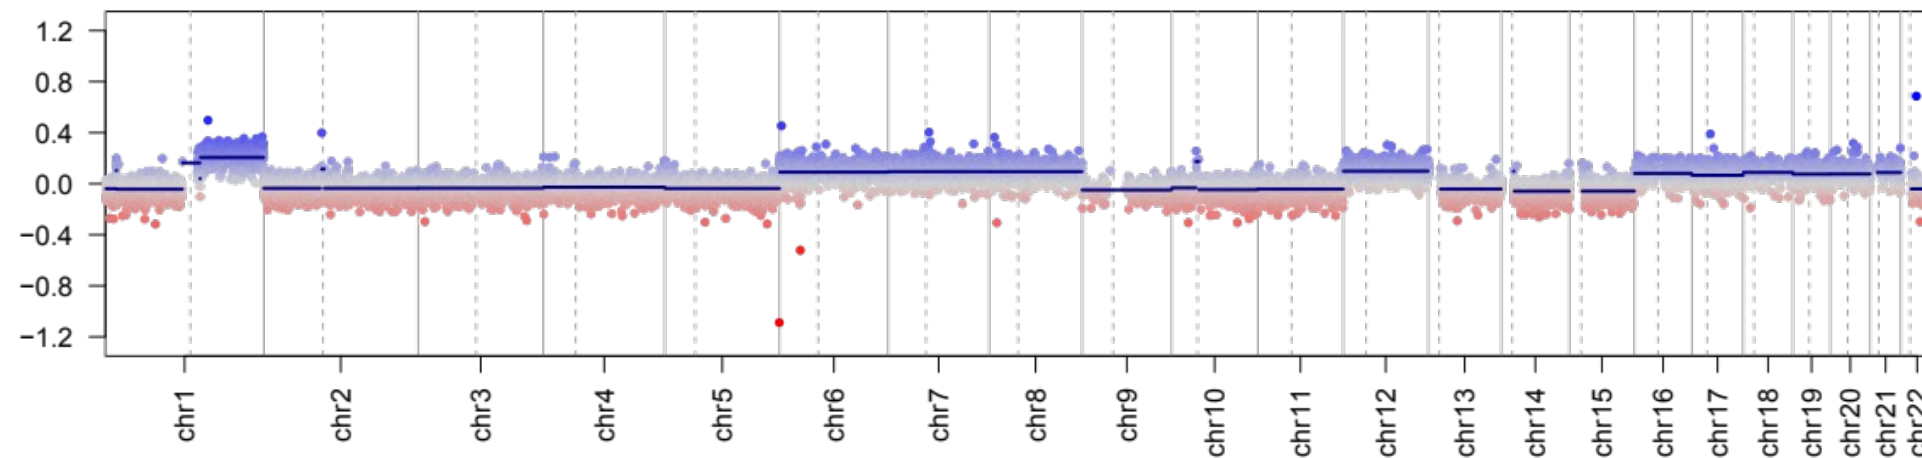

(A)

Ultrasonic aspirator I DX-BLN-044

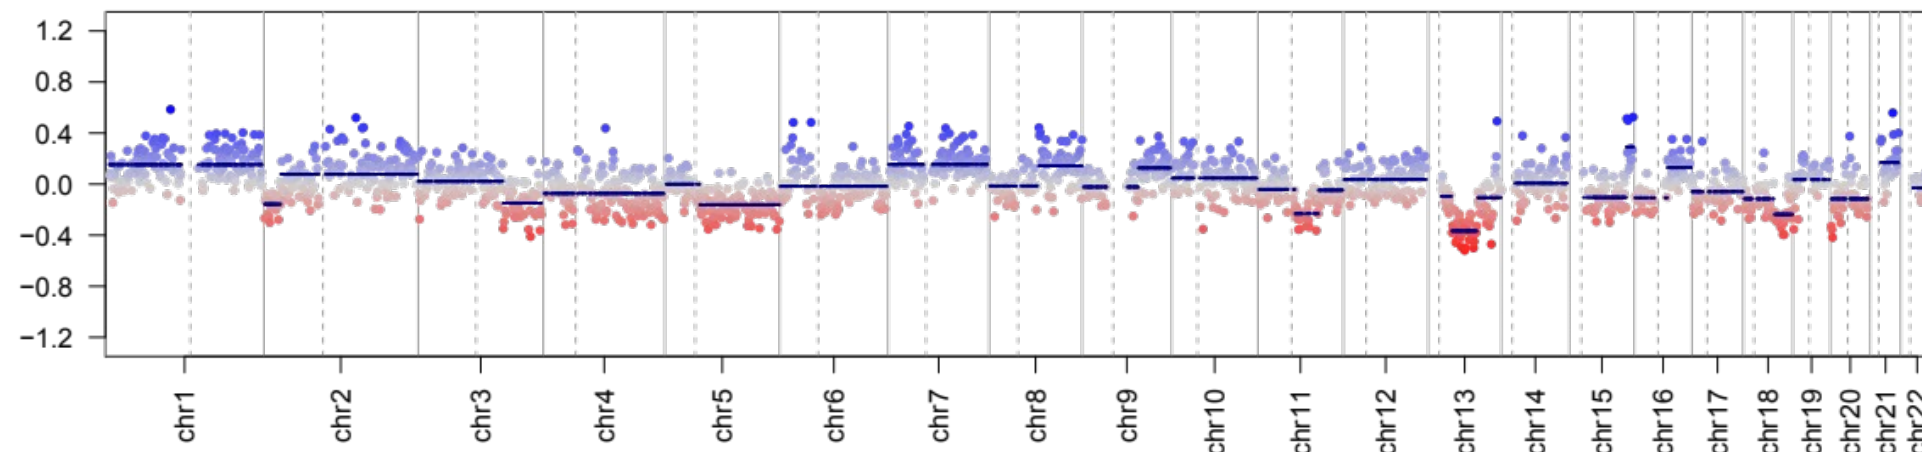

(B)

Microarray I DX-BLN-044

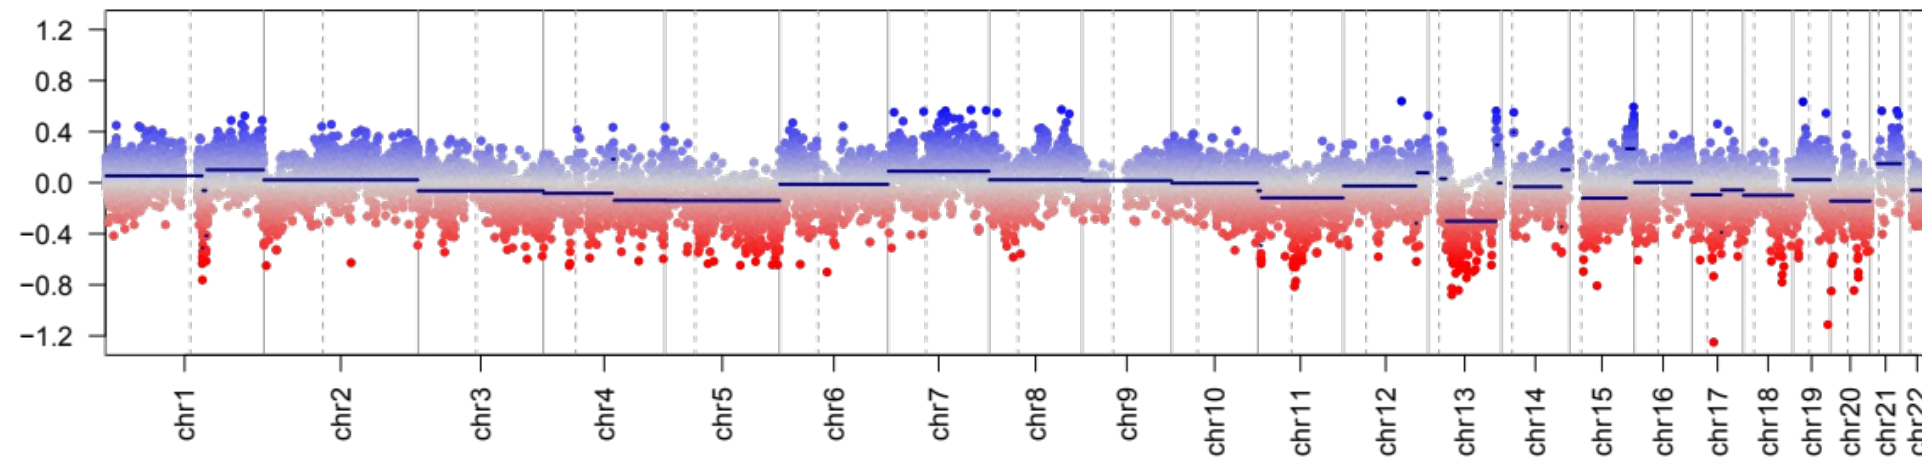



(A)

Ultrasonic aspirator I DX-BLN-047

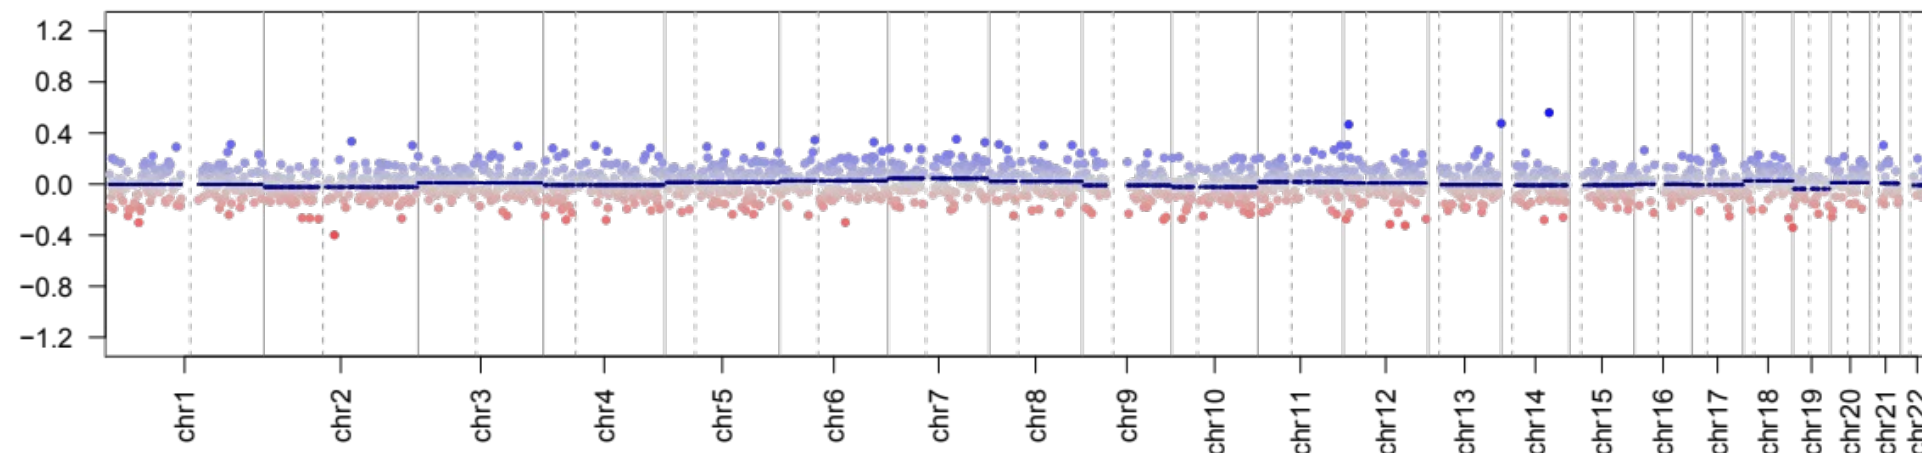

(B)

Microarray I DX-BLN-047

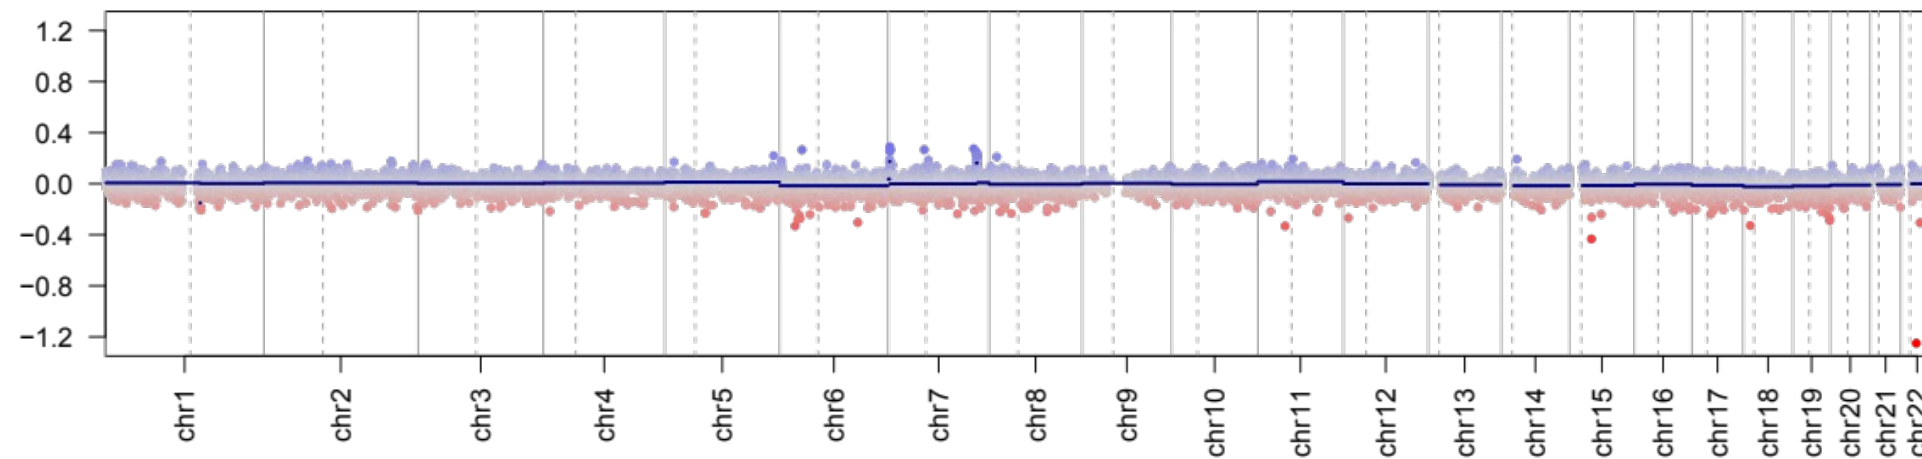

(A)

Ultrasonic aspirator I DX-BLN-048

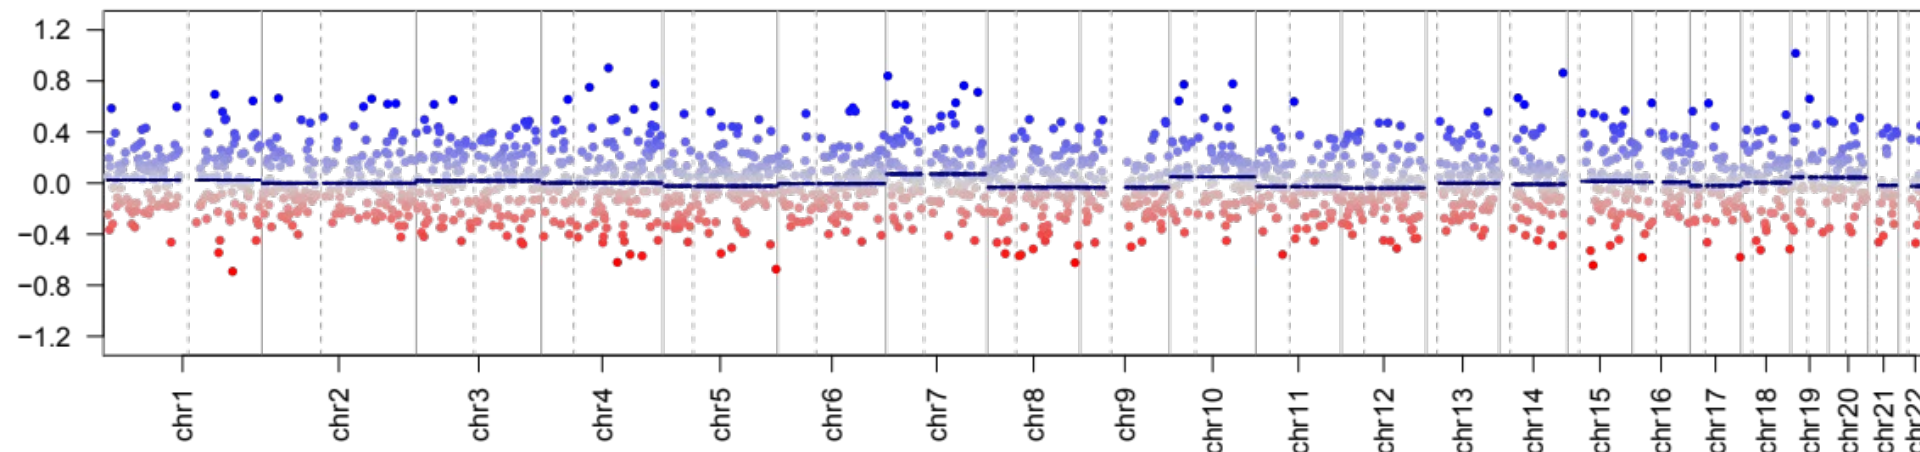

(B)

Microarray I DX-BLN-048

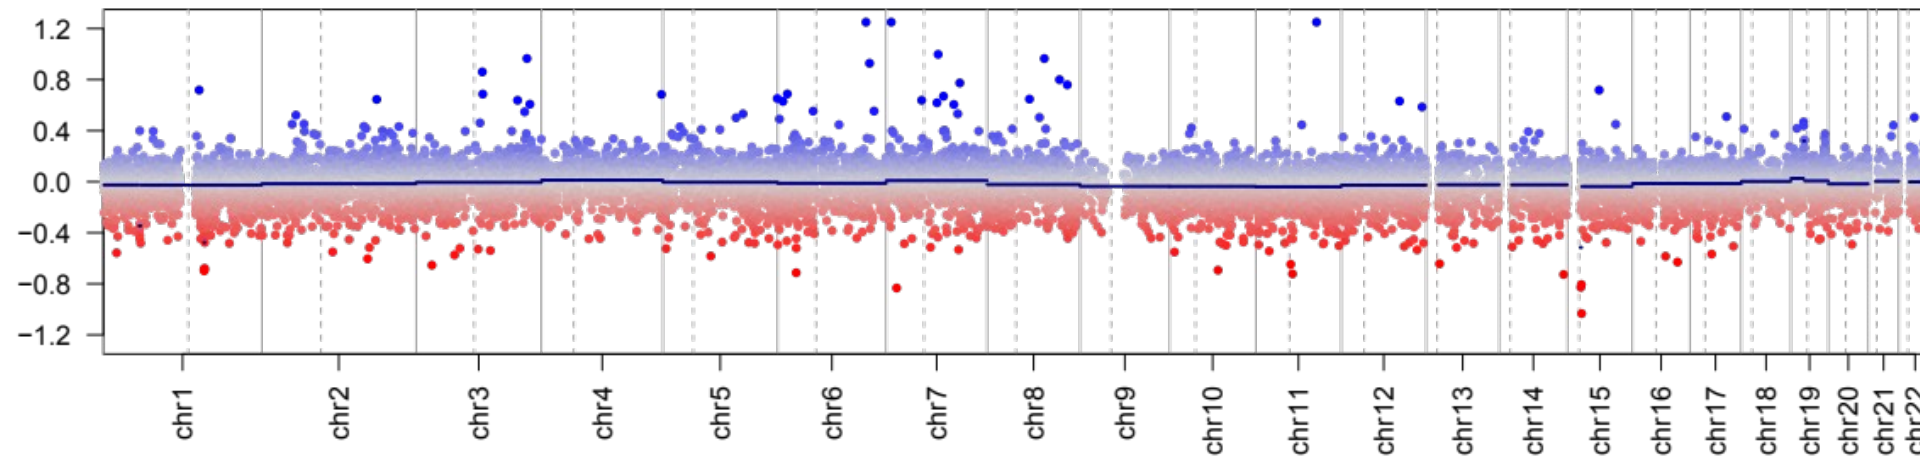

(A)

Ultrasonic aspirator I DX-BLN-049

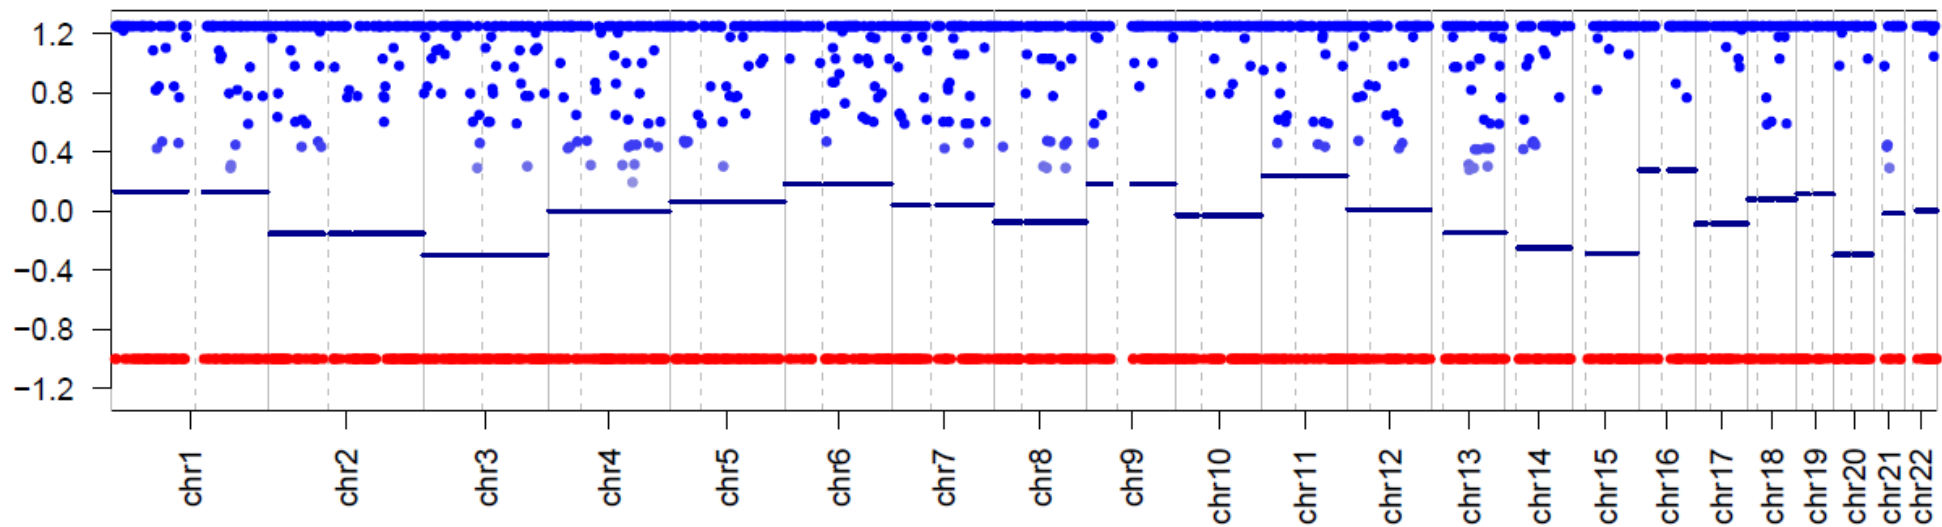

(B)

Microarray I DX-BLN-049

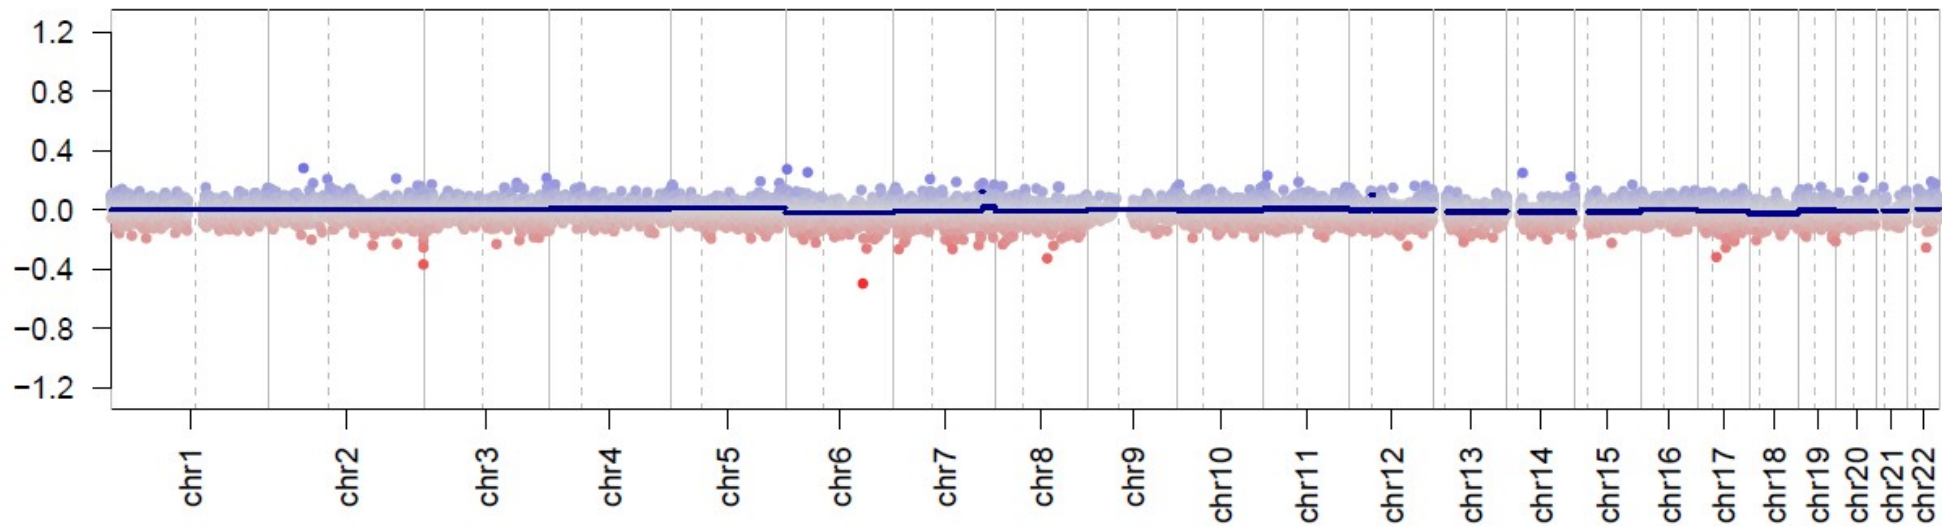

(A)

Ultrasonic aspirator I DX-BLN-050

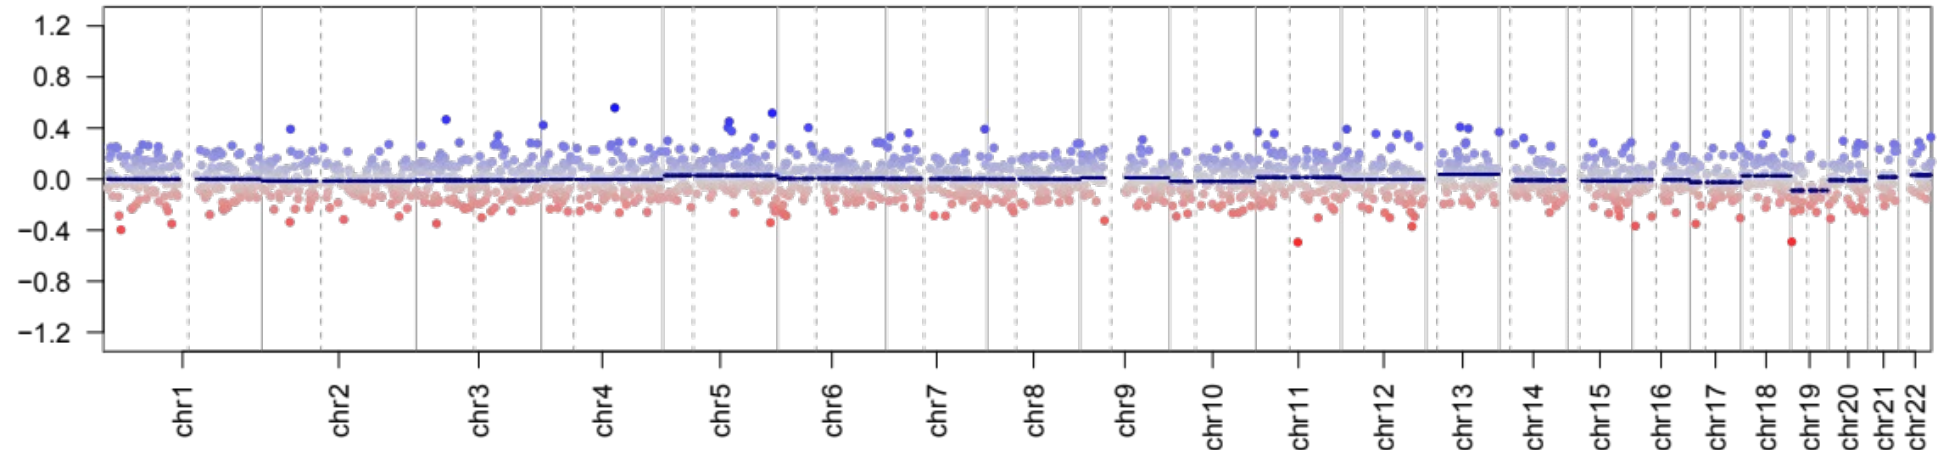

(B)

Microarray I DX-BLN-050

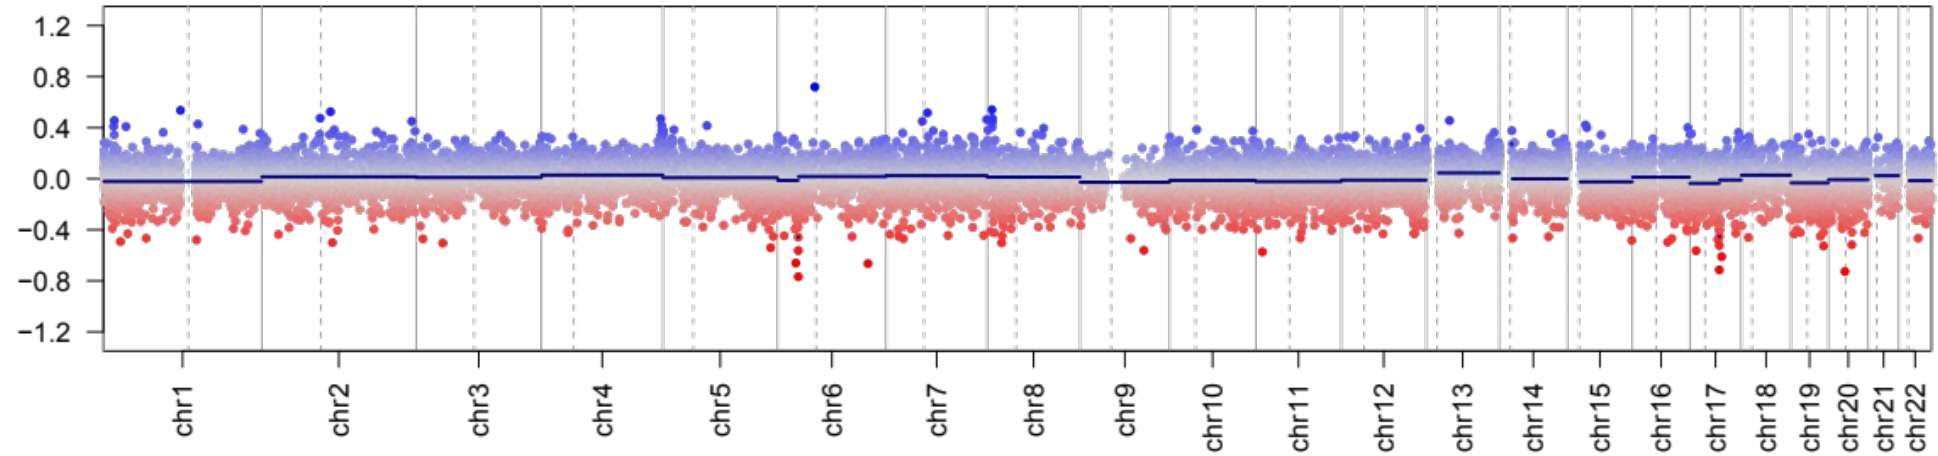

(A)

Ultrasonic aspirator I DX-BLN-054

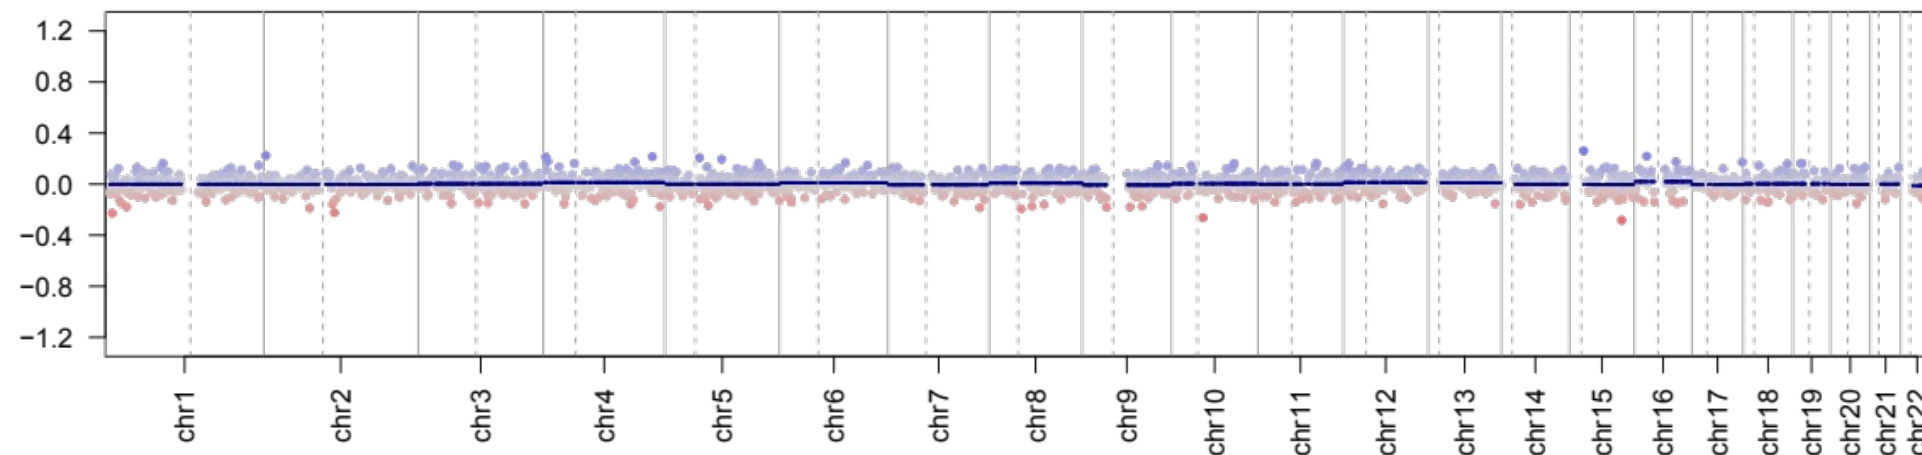

(B)

Microarray I DX-BLN-054

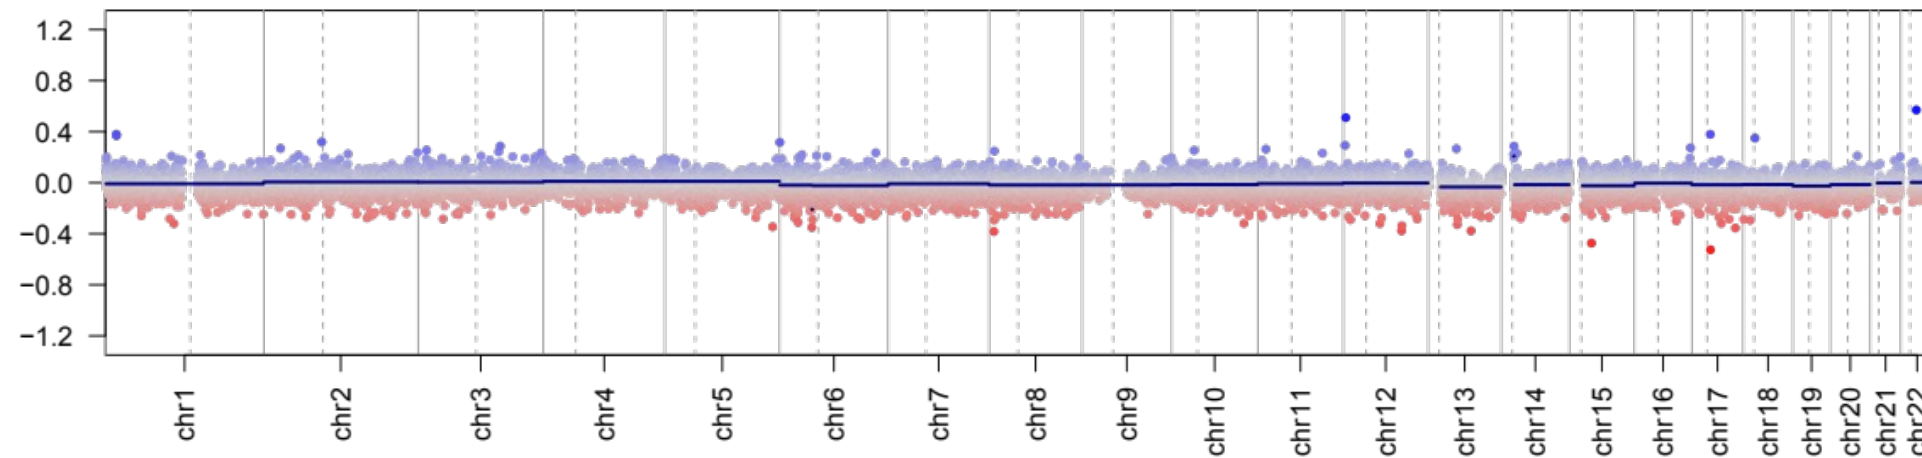



(A)

Ultrasonic aspirator I DX-BLN-057

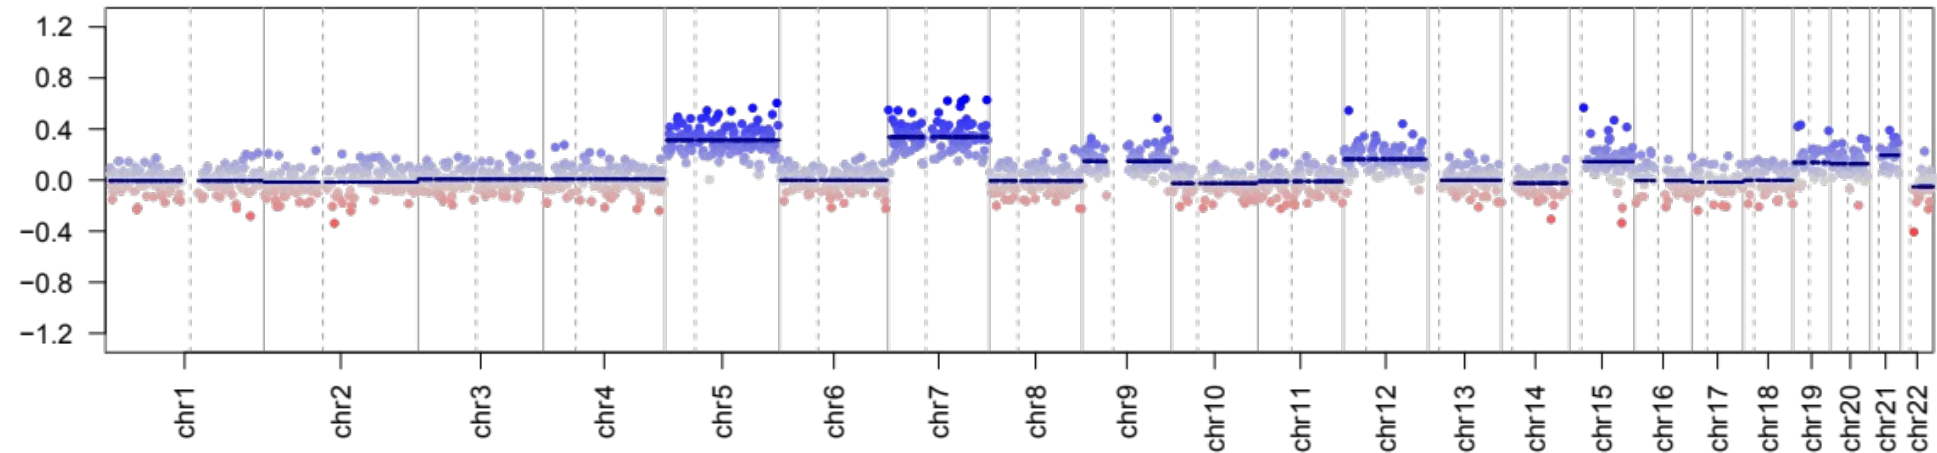

(B)

Microarray I DX-BLN-057

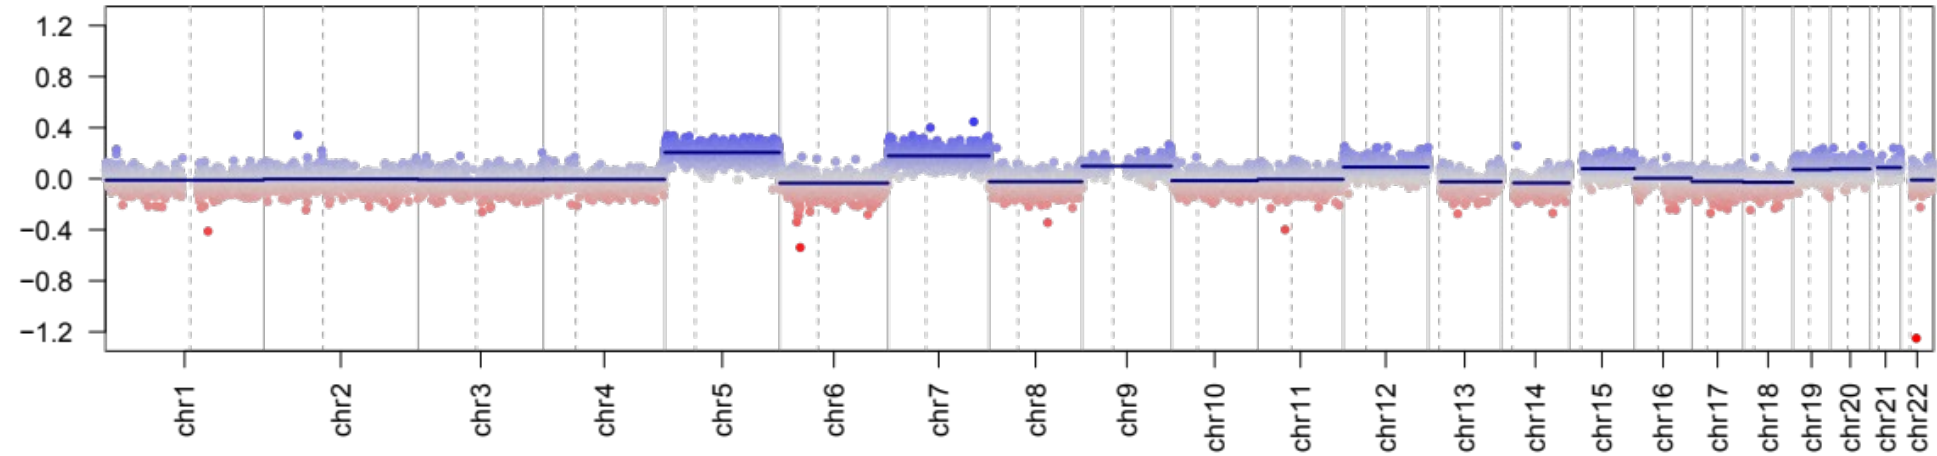

(A)

Ultrasonic aspirator I DX-BLN-064

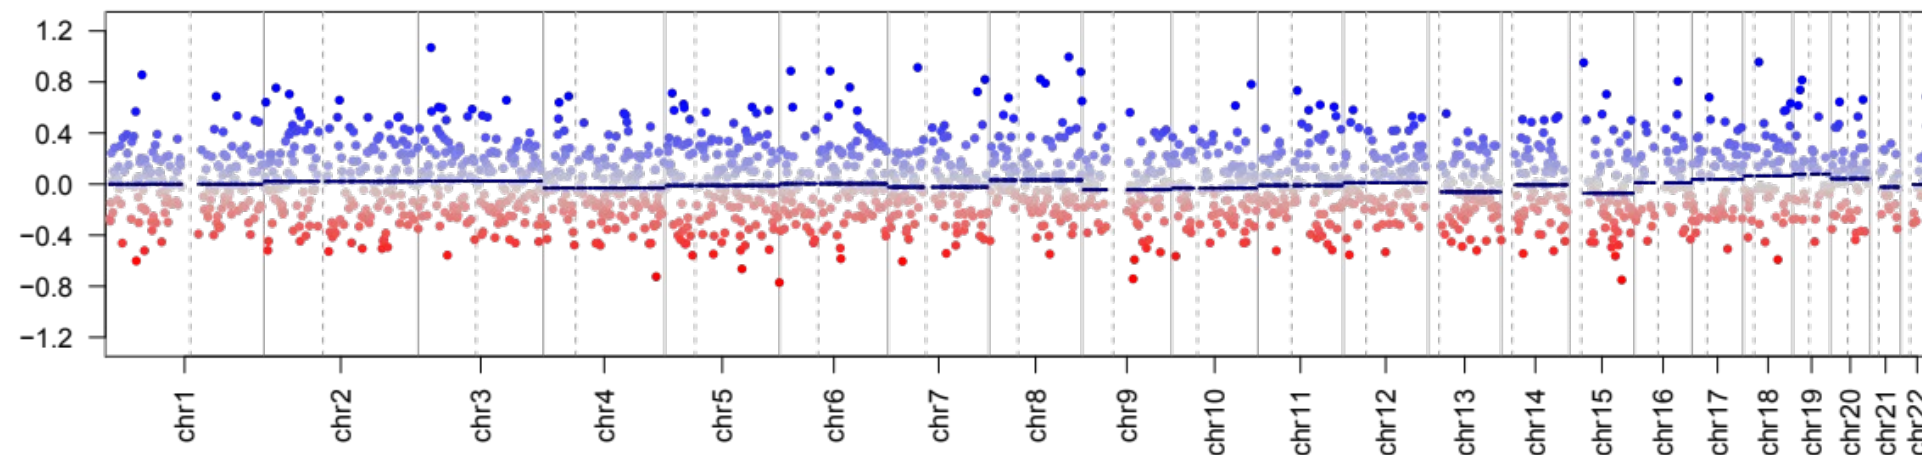

(B)

Microarray I DX-BLN-064

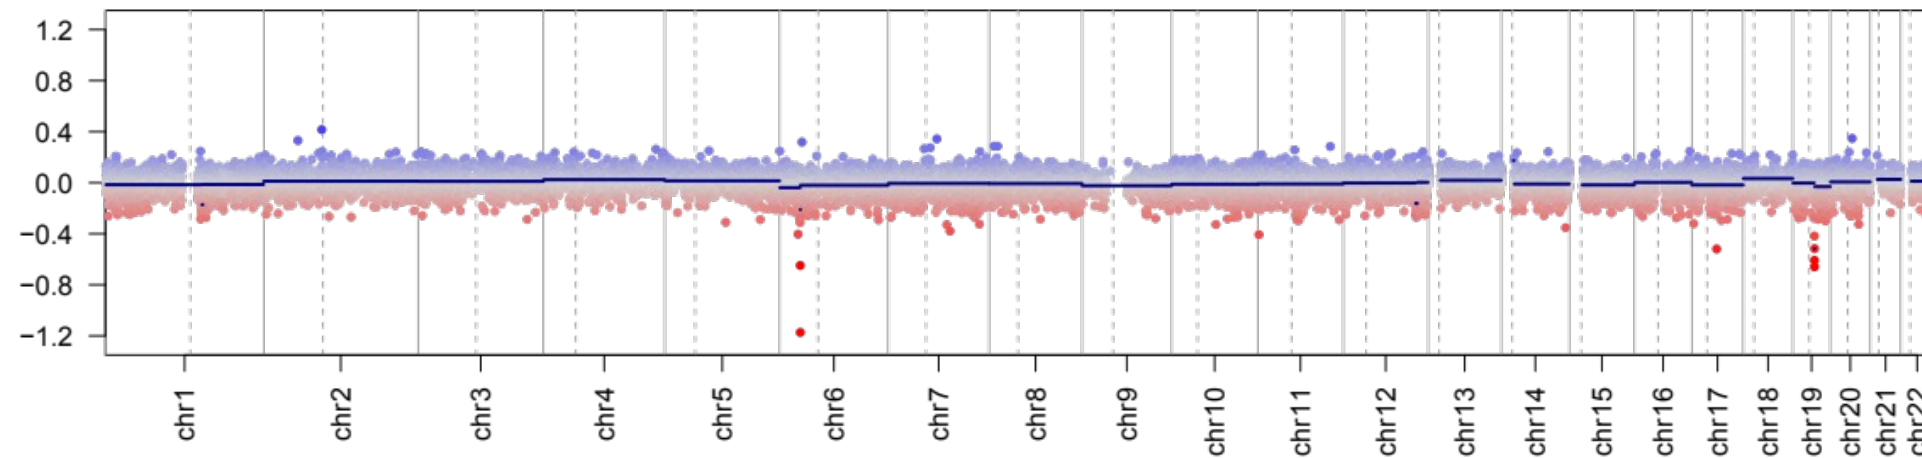

(A)

Ultrasonic aspirator I DX-BLN-065

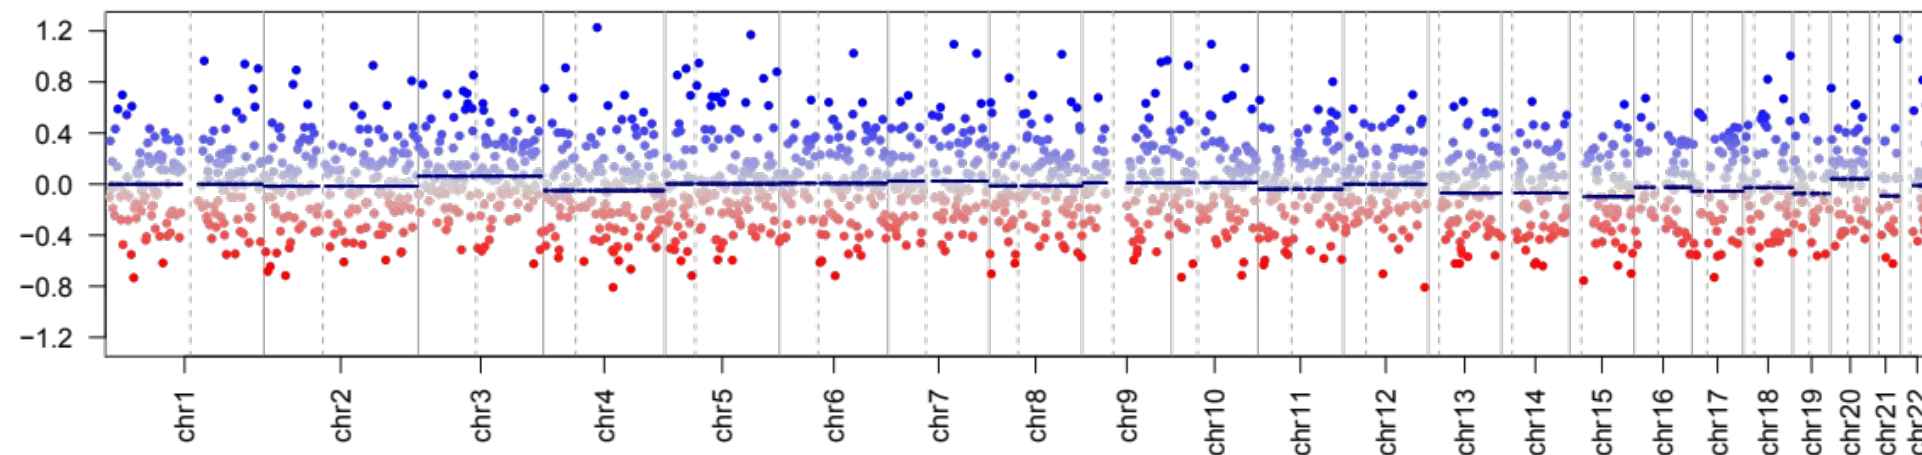

(B)

Microarray I DX-BLN-065

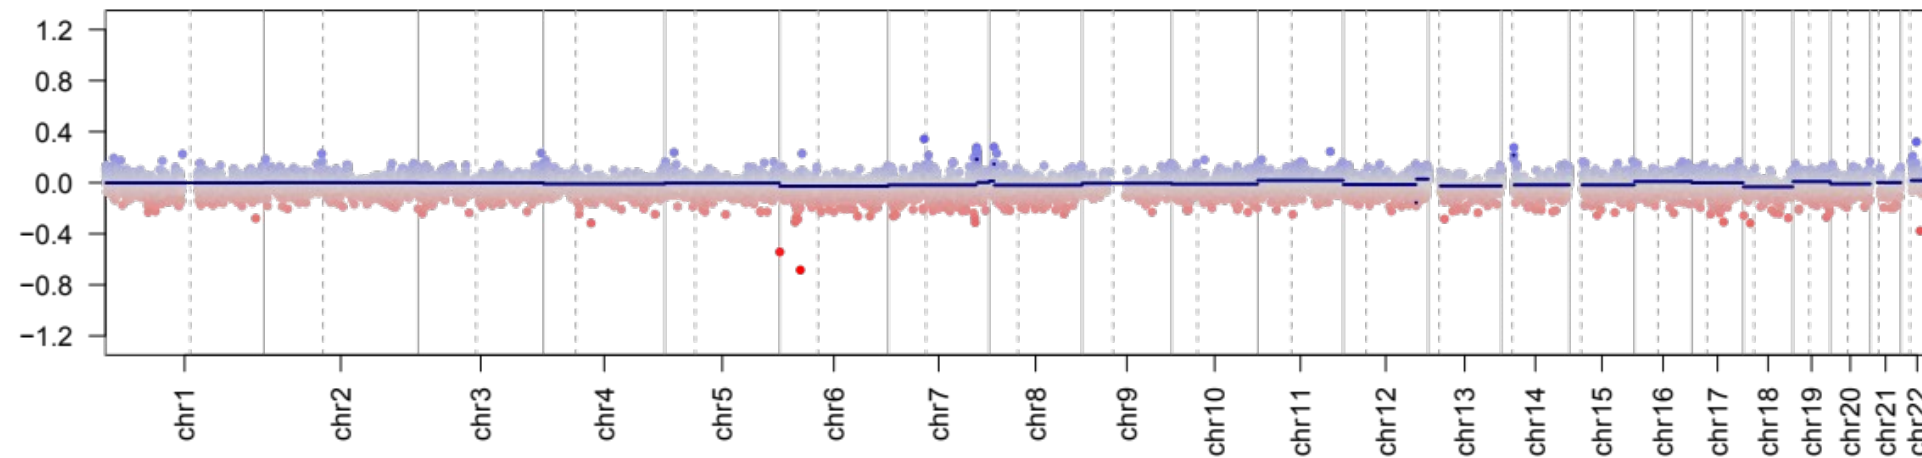

(A)

Ultrasonic aspirator I DX-BLN-071

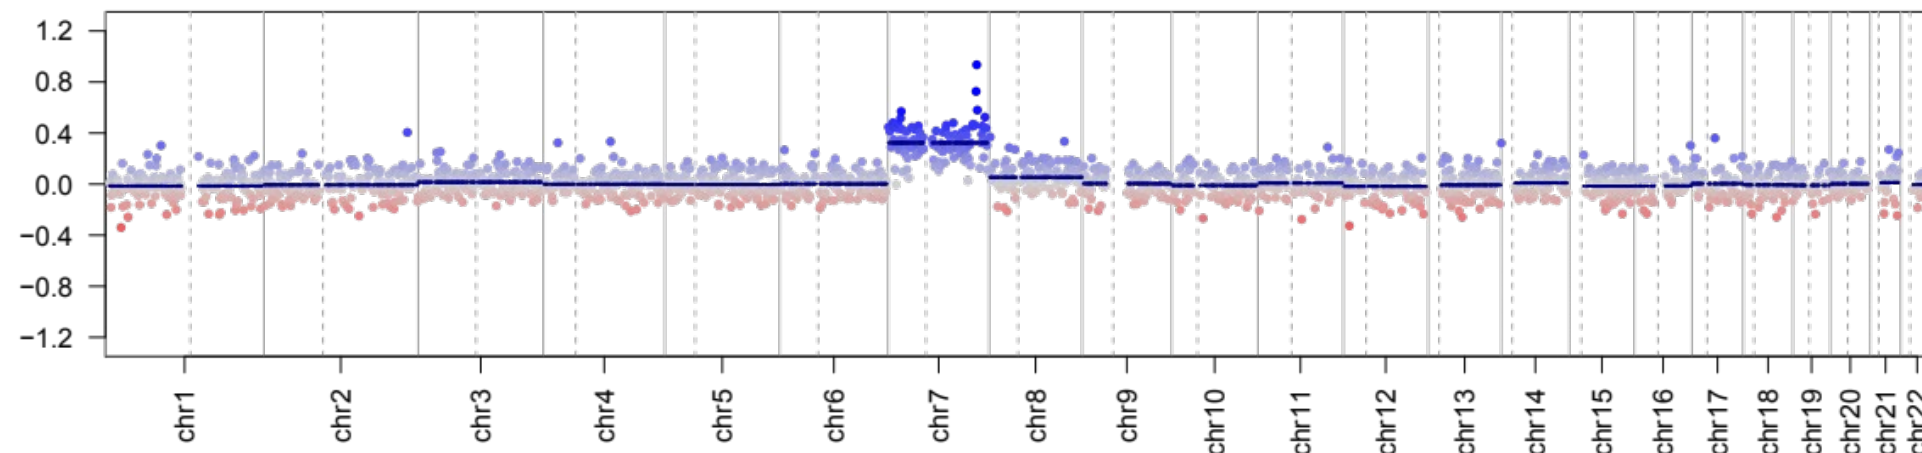

(B)

Microarray I DX-BLN-071

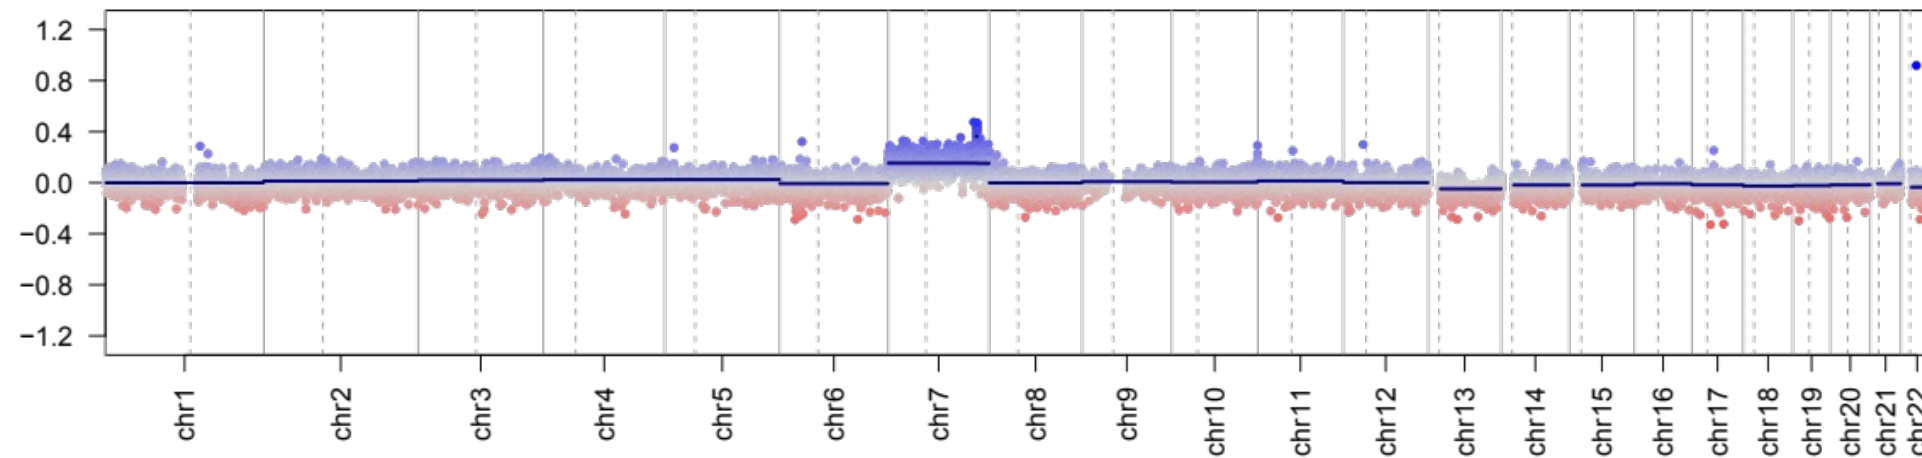

(A)

Ultrasonic aspirator I DX-BLN-072

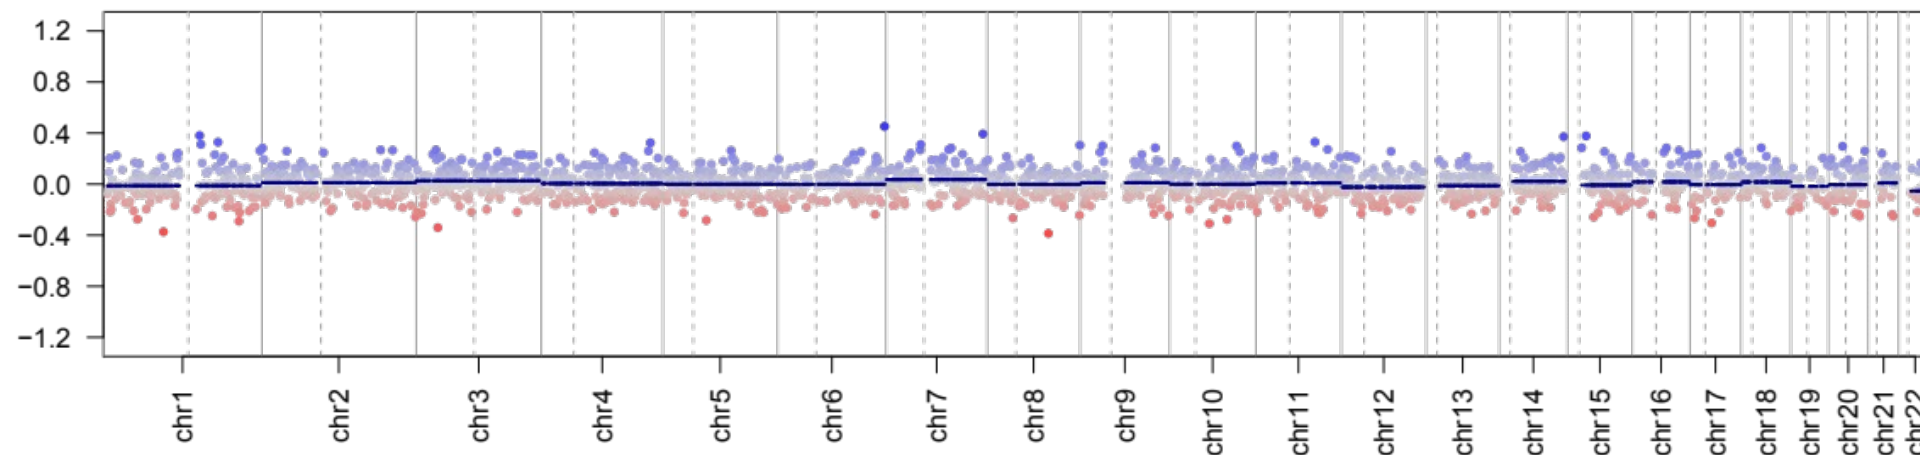

(B)

Microarray I DX-BLN-072

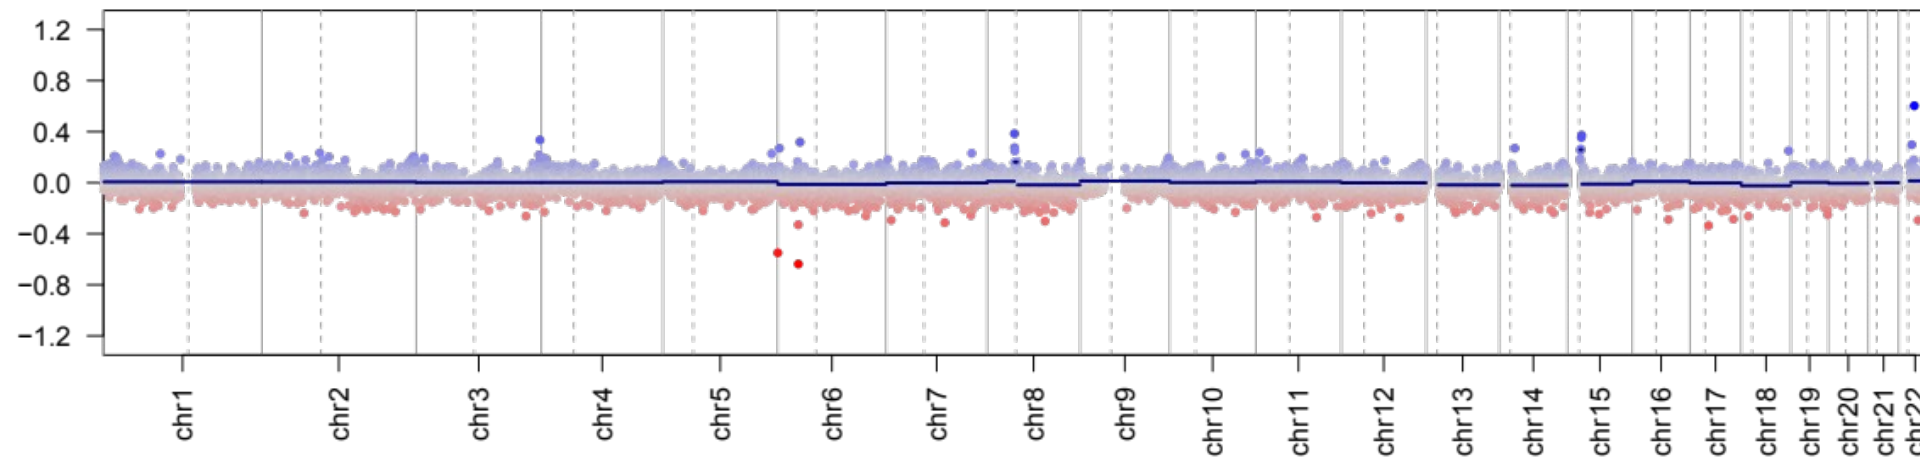



(A)

Ultrasonic aspirator I DX-BLN-073

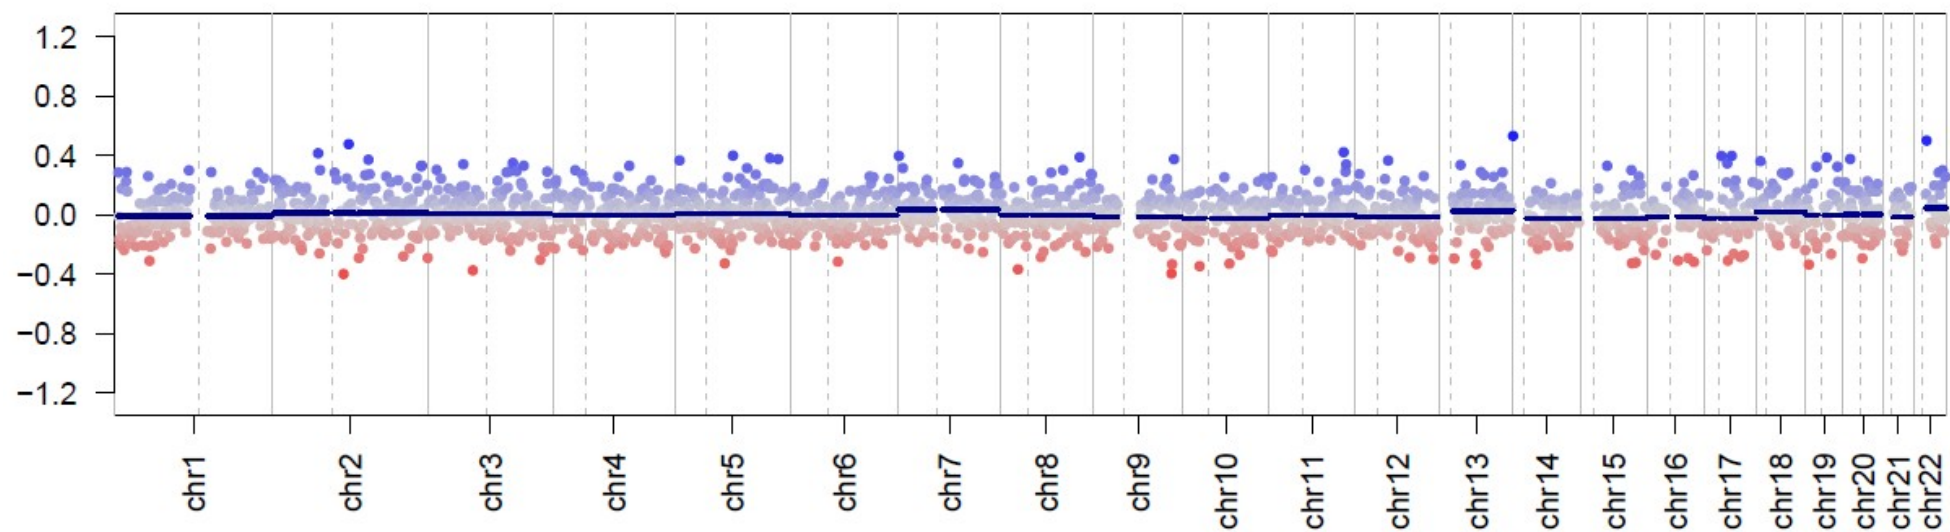

(B)

Microarray I DX-BLN-073

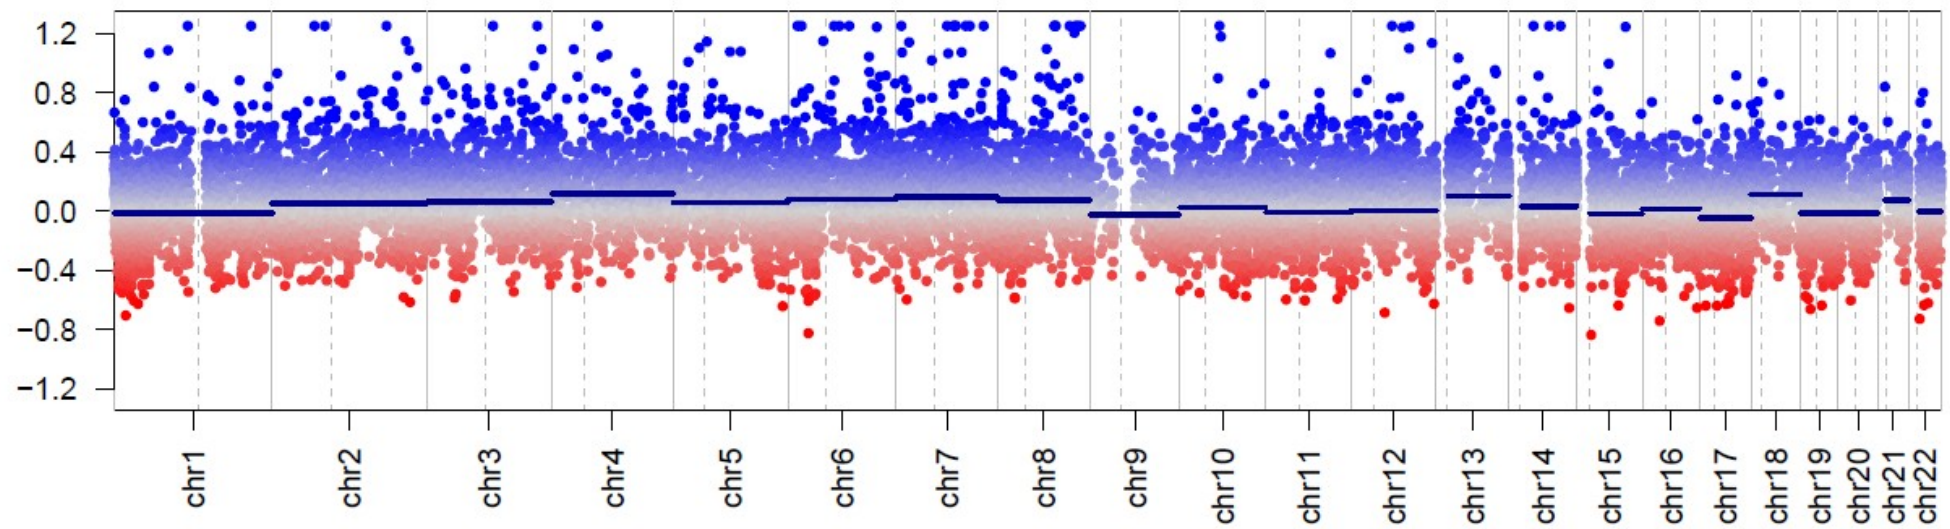

(A)

Ultrasonic aspirator I DX-BLN-074

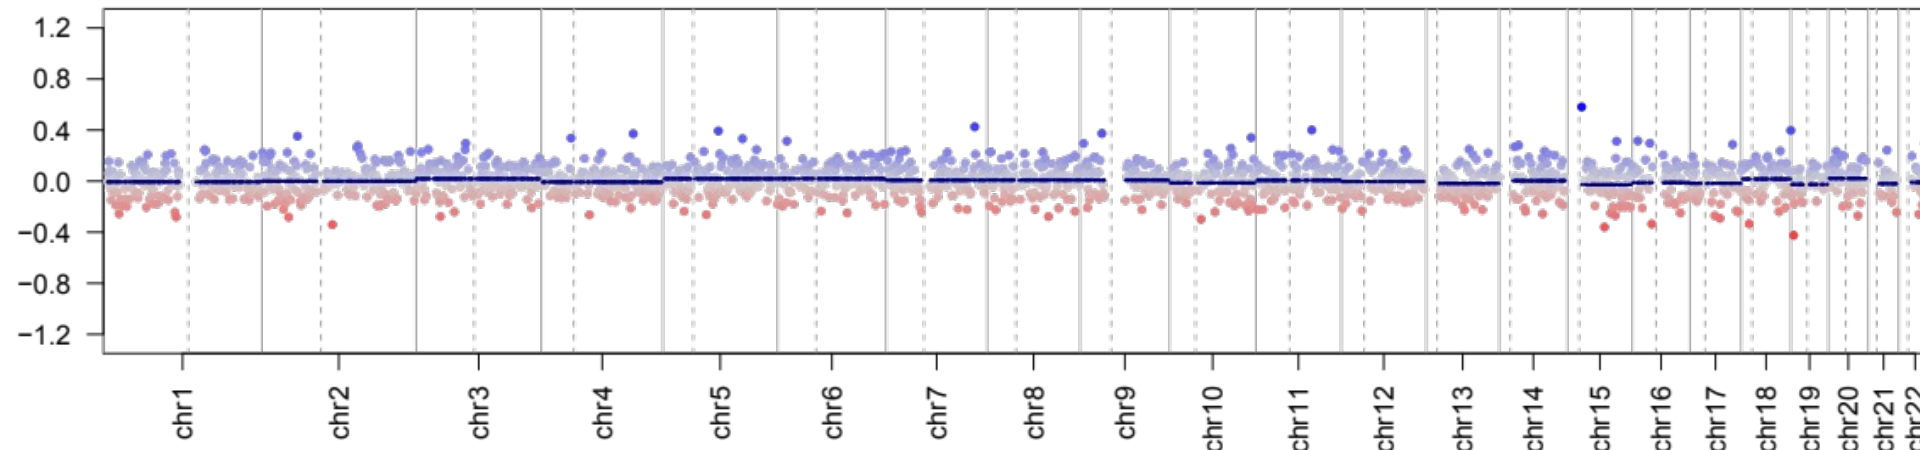

(B)

Microarray I DX-BLN-074

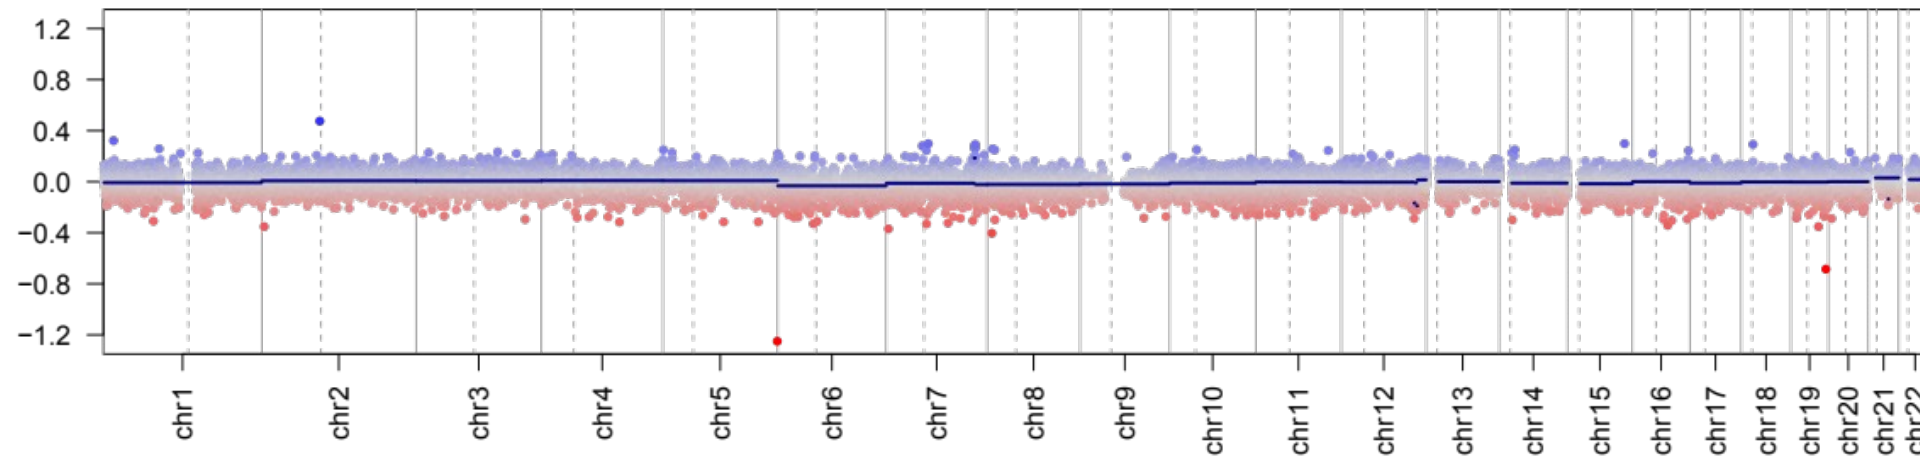

(A)

Ultrasonic aspirator | DX-BLN-075

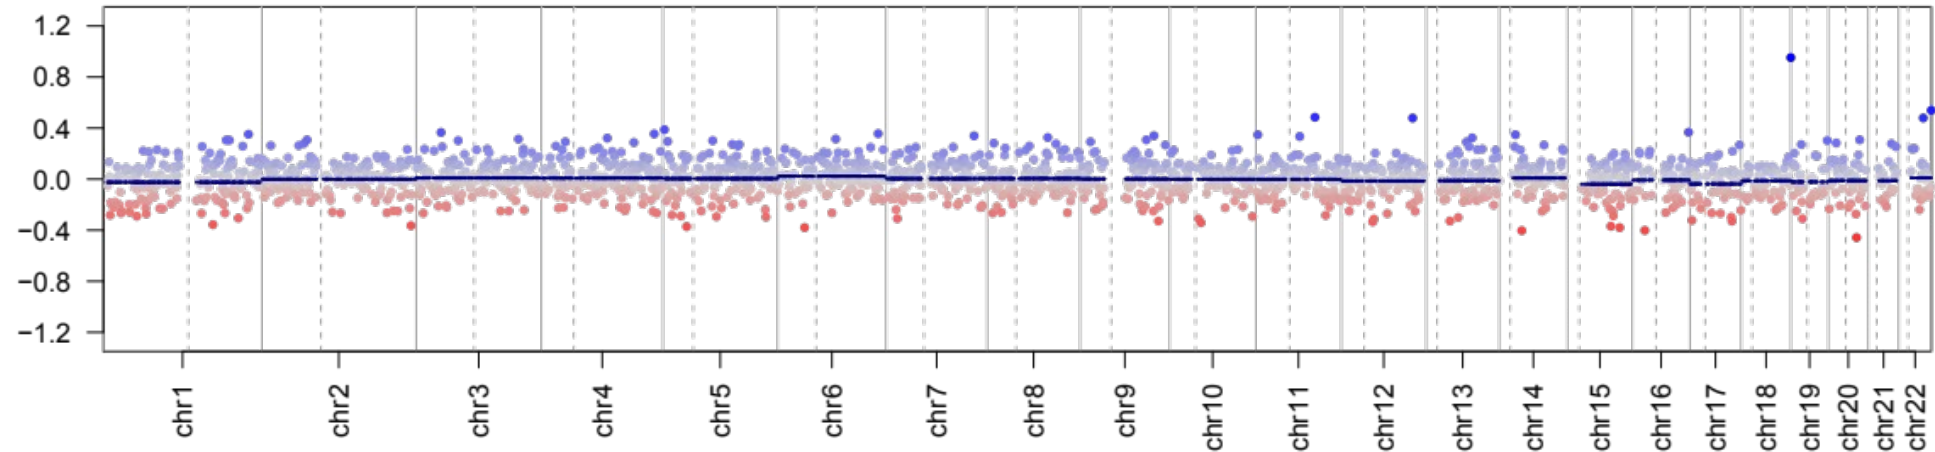

(B)

Microarray | DX-BLN-075

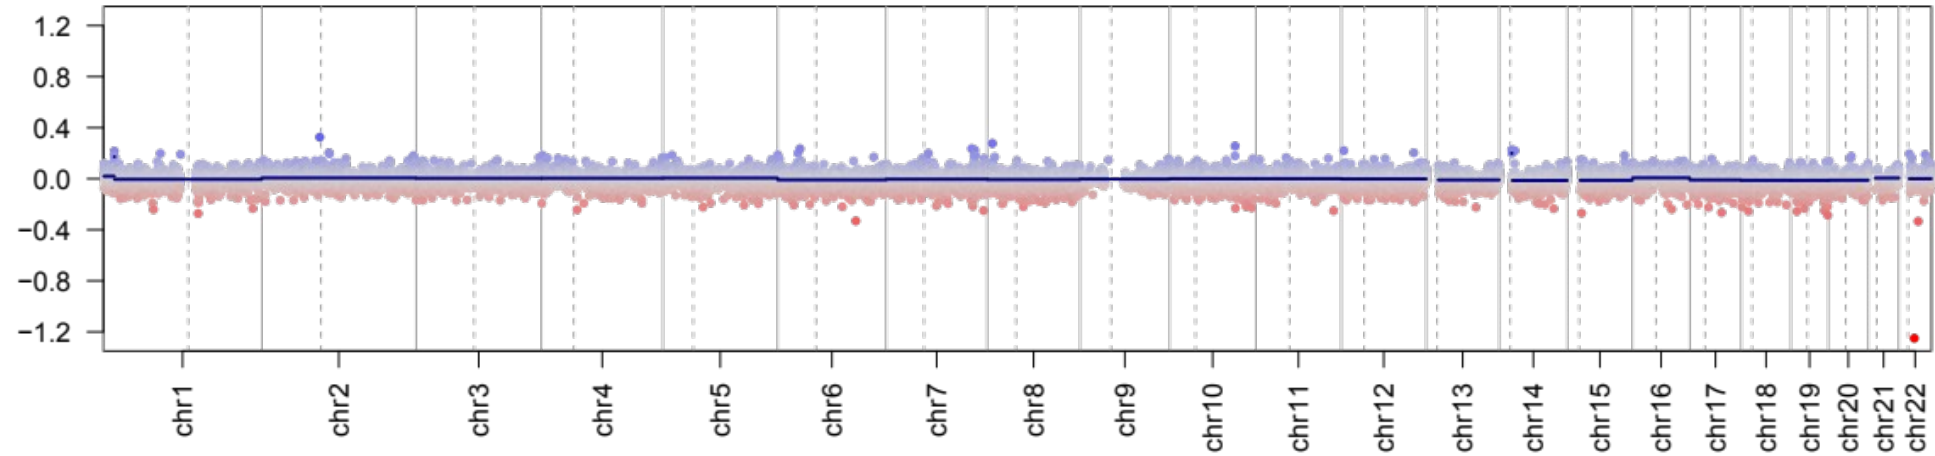

Supplement: 11060_2024_4702_MOESM1_ESM.pdf [file 11060_2024_4702_MOESM1_ESM.pdf]
